1 **Deciphering tea tree chloroplast and**  
2 **mitochondrial genomes of *Camellia sinensis* var.**  
3 ***assamica***

4

5 **Fen Zhang<sup>\*1</sup>, Wei Li<sup>\*1</sup>, Cheng-wen Gao<sup>†1</sup>, Li-zhi Gao<sup>\*‡2</sup>**

6

7 <sup>\*</sup> Institution of Genomics and Bioinformatics, South China Agricultural University,

8 Guangzhou 510642, China

9 <sup>†</sup> Affiliated Hospital, Qingdao University, Qingdao 266003, China

10 <sup>‡</sup> Plant Germplasm and Genomics Center, Germplasm Bank of Wild Species in

11 Southwestern China, Kunming Institute of Botany, Chinese Academy of Sciences,

12 Kunming 650204, China

13

14 <sup>1</sup> **Authors who have made equal contributions**

15 <sup>2</sup> **Corresponding Author:**

16 Li-zhi Gao

17 Tel/Fax: +86-871-65223277

18 E-mail: [Lgaogenomics@163.com](mailto:Lgaogenomics@163.com)

19

20

## 21 **ABSTRACT**

22 Tea is the most popular non-alcoholic caffeine-containing and the oldest beverage in  
23 the world. Despite its enormous industrial, cultural and medicinal values, the  
24 chloroplast (cp) and mitochondrial (mt) genomes are not available for *Camellia*  
25 *sinensis* var. *assamica*. In this study, we *de novo* assembled the cp genome sequence  
26 of *C. sinensis* var. *assamica* into a circular contig of 157,100 bp in length with an  
27 overall GC content of 37.29%, comprising a large single-copy region (LSC, 86,649  
28 bp) and a small single-copy region (SSC, 18,285 bp) separated by a pair of inverted  
29 repeats (IRs, 26,083 bp). We annotated a total of 141 cp genes, of which 87 are  
30 protein-coding genes, 46 are tRNA genes, and eight are rRNA genes. We also *de*  
31 *nov* assembled the mt genome of *C. sinensis* var. *assamica* into two complete  
32 circular scaffolds (702,253 bp and 178,082 bp) with overall GC contents of 45.63%  
33 and 45.81%, respectively. We annotated a total of 71 mt genes, including 44  
34 protein-coding genes, 24 tRNAs, and 3 rRNAs. Comparative analysis suggests  
35 repeat-rich nature of the mt genome compared to the cp genome, for example, with  
36 the characterization of 37,878 bp and 149 bp of long repeat sequences and 665 and  
37 214 SSRs, respectively. We also detected 478 RNA-editing sites in 42 protein-coding  
38 mt genes, which are ~4.4-fold more than 54 RNA-editing sites detected in 21  
39 protein-coding cp genes. The high-quality cp and mt genomes of *C. sinensis* var.  
40 *assamica* presented in this study will become an invaluable resource for a range of  
41 genetic, functional, evolutionary and comparative genomic studies in tea tree and  
42 other *Camellia* species of the Theaceae family.

43

44 **Key words:** *Camellia sinensis* var. *assamica*; chloroplast genome; mitochondria  
45 genome; genome assembly; tea tree

46 11.38/2.57

## 47 INTRODUCTION

48 Tea is the most popular non-alcoholic caffeine-containing and the oldest beverage in  
49 the world since 3000 B. C. (Banerjee 1992; Mondal *et al.* 2004). The production of  
50 tea made from the young leaves of *Camellia sinensis* var. *sinensis* and *C. sinensis* var.  
51 *assamica*, together with ornamentally well-known camellias (e.g., *C. japonica*, *C.*  
52 *reticulata* and *C. sasanqua*) and worldwide renowned woody crop *C. oleifera*  
53 (Ming and Bartholomew 2007) has made the genus *Camellia* possess huge economic  
54 values in Theaceae. Besides its industrial, cultural and medicinal values, botanists  
55 and evolutionary biologists have increasingly paid attention to this genus. As a result  
56 of frequent hybridization and polyploidization, *Camellia* is almost commonly  
57 regarded as one of the most taxonomically and phylogenetically difficult taxa in  
58 flowering plants (Huang *et al.* 2014). Thus, it has long been problematic for the  
59 taxonomic classification of the *Camellia* species based on the morphological  
60 characteristics (Lu *et al.* 2012). The chloroplast (cp) genomes are able to provide  
61 valuable information for taxonomic classification, tracing source populations  
62 (Mccauley *et al.* 1996; Small and Wendel 2004) and the reconstruction of phylogeny  
63 to resolve complex evolutionary relationships (Jansen *et al.* 2007; Moore *et al.* 2010;  
64 Parks *et al.* 2009) due to the conservation of genomic structure, maternal inheritance  
65 and a fairly low recombination rate. Genetically speaking, cp genomes are  
66 comparatively conserved than plant mitochondria (mt) genomes which are more  
67 heterogeneous in nature. It has long been acknowledged that mtDNA has the  
68 propensity to integrate DNA from various sources through intracellular and  
69 horizontal transfer (Schuster and Brennicke 1987; Stern and Lonsdale 1982; Vaughn  
70 *et al.* 1995). Partially due to these reasons, the mt genomes vary from ~200 Kbp to  
71 ~11.3 Mbp in some living organisms (Alverson *et al.* 2010; Sloan *et al.* 2012; Ward  
72 *et al.* 1981). The dynamic nature of mt genome structure has been recognized, and  
73 plant mt genomes can have a variety of different genomic configurations due to the  
74 recombination and differences in repeat content (Marechal and Brisson 2010; Palmer  
75 and Herbon 1988). These characteristics make the plant mt genome a fascinating

76 genetic system to investigate questions related to evolutionary biology. Great efforts  
77 have been made to sequence the 13 representative *Camellia* chloroplast genomes  
78 using next-generation Illumina genome sequencing platform and obtain the first  
79 insight into global patterns of structural variation across the *Camellia* cp genomes  
80 (Huang *et al.* 2014). The reconstruction of phylogenetic relationships among these  
81 representative species of *Camellia* suggests that cp genomic resources are able to  
82 provide useful data to help to understand their evolutionary relationships and classify  
83 the ‘difficult taxa’. Recently, we decoded the first nuclear genome of *C. sinensis* var.  
84 *assamica* cv. *Yunkang10*, providing novel insights into genomic basis of tea flavors  
85 (Xia *et al.* 2017). Besides the absence of the *C. sinensis* var. *assamica* cp genome  
86 among 15 cp genomes that we have sequenced in this genus (Huang *et al.* 2014),  
87 none of mt genome is deciphered in the genus *Camellia*.

88 In this study, we filtered cpDNA and mtDNA reads from the WGS genome  
89 sequence project (Xia *et al.* 2017) and first *de novo* assembled the mt genome and cp  
90 genome of *C. sinensis* var. *assamica*. The information of both cp and mt genomes  
91 will help to obtain a comprehensive understanding of the taxonomy and evolution of  
92 the genus *Camellia*. These genome sequences will also facilitate the genetic  
93 modification of these economically important plants, for example, through  
94 chloroplast genetic engineering technologies.

95

## 96 **MATERIALS AND METHODS**

### 97 **Plant materials, DNA extraction and genome sequencing**

98 Young and healthy leaves of an individual plant of cultivar *Yunkang 10* of *C. sinensis*  
99 var. *assamica* were collected for genome sequencing in April, 2009, from Menghai  
100 County, Yunnan Province, China. Fresh leaves were harvested and immediately  
101 frozen in liquid nitrogen after collection, followed by the preservation at -80°C in the  
102 laboratory prior to DNA extraction. High-quality genomic DNA was extracted from  
103 leaves using a modified CTAB method (Porebski *et al.* 1997). RNase A and  
104 proteinase K were separately used to remove RNA and protein contamination. The  
105 quality and quantity of the isolated DNA were separately checked by electrophoresis

106 on a 0.8% agarose gel and a NanoDrop D-1000 spectrophotometer (NanoDrop  
107 Technologies, Wilmington, DE). A total of eleven paired-end libraries, including four  
108 types of small-insert libraries (180 bp, 260 bp, 300 bp, 500 bp) and seven large-insert  
109 libraries (2 Kb, 3 Kb, 4 Kb, 5 Kb, 6 Kb, 8 Kb, 20 Kb), were prepared following the  
110 Illumina's instructions, and sequenced using Illumina HiSeq2000 platform by  
111 following the standard Illumina protocols (Illumina, San Diego, CA). We totally  
112 generated ~707.88 Gb (~229.31×) of raw sequencing data (Xia *et al.* 2017). Further  
113 reads quality control filtering processes yielded a total of ~492.15 Gb (~159.43×)  
114 high-quality data retained and used for subsequent genome assembly.

115

### 116 ***De novo* chloroplast and mitochondria genome assemblies**

117 The chloroplast reads were filtered from whole genome Illumina sequencing data of  
118 *C. sinensis* var. *assamica*, we mapped all the sequencing reads to the reference  
119 genomes (Huang *et al.* 2014) using bowtie2 (version 2.3.4.3) (Langmead *et al.* 2009).  
120 The mapped chloroplast reads were assembled using CLC Genomics Workbench v.  
121 3.6.1 (CLC Inc., Rarhus, Denmark). For mitochondria genome assembly, the PE and  
122 MP sequencing reads were used separately. Briefly, we first performed *de novo*  
123 assembly with VELVET v1.2.08 (Zerbino and Birney 2008), which was previously  
124 described (Grewe *et al.* 2014; Zhu *et al.* 2014). Scaffolds were constructed using  
125 SSPACE v.3.0 (Boetzer *et al.* 2011). False connection was manually removed based  
126 on the coverage and distances of paired reads. Gaps between scaffolds were then  
127 filled with GapCloser (version 1.12) (Luo *et al.* 2012) using all pair-end reads. The  
128 completed chloroplast and mitochondria genomes are publicly available in  
129 GeneBank under accession numbers XXXXX and XXXXX.

130

### 131 **Genome annotation and visualization**

132 The complete chloroplast genome of *C. sinensis* var. *assamica* was preliminarily  
133 annotated using the online program DOGMA (Dual Organellar Genome Annotator)  
134 (Wyman *et al.* 2004) followed by manual correction. MITOFY (Alverson *et al.* 2010)  
135 was used to characterize the complement of protein-coding and rRNA genes in the

136 mitochondrial genome. A tRNA gene search was carried out using the tRNA scan-SE  
137 software(version 1.3.1) (Lowe and Eddy 1997). Circular genome maps were drawn  
138 with OrganellarGenomeDRAW (Lohse *et al.* 2007). Simple sequence repeats (SSRs)  
139 were identified and located using MISA (<http://pgrc.ipk-gatersleben.de/misa/>). All  
140 the annotated SSRs were classified by the size and copy number of their tandemly  
141 repeated: monomer (one nucleotide,  $n \geq 8$ ), dimer (two nucleotides,  $n \geq 4$ ),  
142 trimer (three nucleotides,  $n \geq 4$ ), tetramer (four nucleotides,  $n \geq 3$ ), pentamer  
143 (five nucleotides,  $n \geq 3$ ), hexamer (six nucleotides,  $n \geq 3$ ). Repeat sequences  
144 including forward and palindromic repeats, were also searched by REPuter (Kurtz *et*  
145 *al.* 2001) with the following parameters: minimal length 50 nt; mismatch 3 nt.

146

#### 147 **Prediction of RNA-editing sites**

148 Putative RNA editing sites in protein-coding genes were predicted using the  
149 PREP-cp and PREP-mt Web-based program (<http://prep.unl.edu/>) (Mower 2005;  
150 Mower 2009). To achieve a balanced trade-off between the number of false positive  
151 and false negative sites, the cutoff score (C-value) was set to 0.8 and 0.6,  
152 respectively (Chaw *et al.* 2008). All other parameters were set to default. Screening  
153 score value = 1.0 at editing sites are identified as credible RNA editing sites.

154

#### 155 **Phylogenetic analyses**

156 A total of thirteen conserved mt protein-coding genes among *C. sinensis* var.  
157 *assamica* and 14 other plant species  
158 (<https://www.ncbi.nlm.nih.gov/genome/browse#!/organelles/>) were individually  
159 aligned with ClustalW (Larkin *et al.* 2007), and then concatenated to construct a  
160 contiguous sequence in the order of *cob*, *cox1*, *cox2*, *cox3*, *nad1*, *nad2*, *nad3*, *nad4*,  
161 *nad4L*, *nad5*, *nad6*, *nad7* and *nad9*. The selected 14 species includes *Cycas*  
162 *taitungensis*, *Ginkgo biloba*, *Triticum aestivum*, *Oryza sativa*, *Sorghum bicolor*, *Zea*  
163 *mays*, *Gossypium arboreum*, *G. barbadense*, *Carica papaya*, *Vitis vinifera*, *Hevea*  
164 *brasiliensis*, *Bupleurum falcatum*, *Glycine max* and *Salvia miltiorrhiza*. The  
165 alignment file was used for the construction of Neighbor-Joining Tree at 1000

166 bootstrap replicates with MEGA 7.0.26 (Kumar *et al.* 2016). We employed the same  
167 method was used for phylogenetic analysis with cp genomes using the GTR+R+ I  
168 model under the maximum likelihood (ML) inference in MEGA v.7.0 (Kumar *et al.*  
169 2016). Besides *C. sinensis* var. *assamica* cv. *Yunkang 10*, we selected cp genomes  
170 from the eighteen *Camelia* species (*C. oleifera*, *C. crapnelliana*, *C. szechuanensis*,  
171 *C. mairei*, *C. elongata*, *C. grandibracteata*, *C. leptophylla*, *C. petelotii*, *C. pubicosta*,  
172 *C. reticulata*, *C. azalea*, *C. japonica*, *C. cuspidata*, *C. danzaiensis*, *C. impressinervis*,  
173 *C. pitardii*, *C. yunnanensis* and *C. taliensis*) using *Apterosperm oblata* as outgroup.

174

#### 175 **Data availability**

176 Assembled mt and cp genome sequences and accompanying gene annotations of *C.*  
177 *sinensis* var. *assamica* have been deposited in the Genome Sequence Archive  
178 (Genomics, Proteomics & Bioinformatics 2017) in BIG Data Center (Nucleic Acids  
179 Res 2018), Beijing Institute of Genomics (BIG), Chinese Academy of Sciences,  
180 under accession numbers XXX and XXX that are publicly accessible at  
181 <http://bigd.big.ac.cn/bioproject>.

## 182 **RESULTS AND DISCUSSION**

### 183 **Genome assembly and gene annotation of the *C. sinensis* var. *assamica* cp and** 184 **mt genomes**

185 The pair-end and mate-pair reads were used to assemble the *C. sinensis* var.  
186 *assamica* cp genome into a circular contig of 157,100 bp in length with an overall  
187 GC content of 37.29% (**Figure 1; Table 1**). It is a typical circular structure,  
188 including a large single-copy region (LSC, 86,649 bp) and a small single-copy  
189 region (SSC, 18,285 bp) separated by a pair of inverted repeats (IRs, 26,083 bp). A  
190 total of 141 genes were annotated, of which 87 were protein-coding genes, 46 were  
191 tRNA genes and eight were rRNA genes. We obtained the two complete circular  
192 scaffolds (702,253 bp and 178,082 bp) of the *C. sinensis* var. *assamica* mt genome  
193 from the *de-novo* assembly of the filtered mitochondrial reads (**Figures 2-4; Table**  
194 **2**). The two scaffolds of the mt genome had overall GC contents of 45.63% and  
195 45.81%, respectively. We annotated a total of 71 genes, including 44 protein-coding  
196 genes, 24 tRNAs and 3 rRNAs (**Table 2**). Among 44 protein-coding genes, there  
197 were six genes with double copies, including *nad1*, *nad2*, *nad9*, *sdh3*, *atp9* and *rps19*.  
198 Of the tRNA genes, there were two copies each for *trnfM* (*Met*), *trnC* (*Cys*) and *trnP*  
199 (*Pro*) and three copies for *trnS* (*Ser*).

200

### 201 **Repeat contents of the *C. sinensis* var. *assamica* mt and cp genomes**

202 A total of 214 SSRs were identified in cp genome with 74.42% of which were  
203 monomers, 19.07% of dimers, 0.47% of trimers, 4.65% of tetramers and 0.93% of  
204 hexamers (**Table 3**). There were no pentamers found in the cp genome. In mt  
205 genome, we discovered 665 SSRs distributed into monomers, dimers, trimers,  
206 pentamers, tetramers and hexamers with 31.53%, 45.35%, 4.95%, 15.17%, 2.70%  
207 and 0.15%, respectively (**Table 3**). Long repeat sequences (repeat unit > 50 bp) of  
208 forward and palindromic repeats were further annotated, resulting in 149 bp from 4  
209 paired repeats in the cp genome (**Table 4**) and 37,878 bp from 58 paired repeats in  
210 the mt genome (**Table 5**). Our repeat content analyses indicate that the mt genome is



211 more abundant in repeat sequences and more variable than the cp genome of *C.*  
212 *sinensis* var. *assamica* (**Table 5**).

213

### 214 **Prediction of RNA-editing sites in the *C. sinensis* var. *assamica* cp and mt** 215 **genomes**

216 Almost all transcripts of protein encoding genes in the plant mitochondria are subject  
217 to RNA editing except the *T-urf13* gene (Ward and Levings 1991). Our results  
218 showed that the extent of RNA editing varied by gene for both cp and mt genomes of  
219 *C. sinensis* var. *assamica*. In the *C. sinensis* var. *assamica* cp genome, we detected  
220 54 RNA-editing sites in 21 protein-coding genes, ranging from one editing site in  
221 *atpF*, *atpI*, *petB*, *psaI*, *psbE*, *psbF*, *rpoA*, *rps2* and *rps8* to 8 editing sites in *ndhB*  
222 (**Table 6**). In the *C. sinensis* var. *assamica* mt genome, we predicted 478  
223 RNA-editing sites in 42 protein-coding genes; they varied from two editing site in  
224 *atp9* (of scaffold2), *sdh3* (of scaffold1 and scaffold2, respectively) and *rps14* (of  
225 scaffold2) to 35 editing sites in *ccmFn* (of scaffold1) (**Table 7-8**).

226

### 227 **Phylogenetic relationships based on cp and mt genomes**

228 To further determine the phylogenetic position of *C. sinensis* var. *assamica* we  
229 performed phylogenomic analysis of 20 complete cp genomes using *Apterosperm*  
230 *oblata* as outgroup. Our results showed that *C. sinensis* var. *assamica* was grouped  
231 with *C. grandibracteata* with 100% bootstrap support (**Figure 5**). We further  
232 examined phylogenetic relationships based on the thirteen conserved mt  
233 protein-coding genes between *C. sinensis* var. *assamica* and 14 other plant species.  
234 Our results showed that *C. sinensis* var. *assamica* is clearly grouped with other  
235 dicots that were separated from monocots of the angiosperms while the two  
236 gymnosperms (*Cycas taitungensis* and *Ginkgo biloba*) were formed the basal clade  
237 (**Figure 6**).

238

### 239 **Conclusions**

240 We *de novo* assembled both cp and mt *C. sinensis* var. *assamica* genomes, of which

241 the mt genome is the first reported in the Theaceae family. A large set of annotated  
242 cp and mt genes with known homology will aid further gene ontology and functional  
243 genomic analyses. There is no doubt that cp genome structure and organization is  
244 much more conserved than mt and nuclear genomes of *C. sinensis* var. *assamica*.  
245 The genome information serves as a powerful tool to better understand the taxonomy,  
246 phylogeny and evolution in the *Camellia* genus. Taken together, the high-quality cp  
247 and mt genomes of *C. sinensis* var. *assamica* presented in this study will become an  
248 invaluable genomic resource for a range of functional, evolutionary and comparative  
249 genomic studies in tea tree and other plant species of the Theaceae family.

250

## 251 **ACKNOWLEDGEMENTS**

252 We would thank Yunnan Tea Research Institute for providing tea plant materials in  
253 this study. We are grateful An-dan Zhu for technical support and anonymous  
254 reviewers for valuable comments on the manuscript. This work was supported by the  
255 Project of Innovation Team of Yunnan Province and Ten Thousands Talents Program  
256 of China (to L. Z. Gao).

257

## 258 **ADDITIONAL INFORMATION**

259 Competing financial interests: The authors declare no competing financial interests.

260

261

262

263

264

265

266

267

268

269

270

271

272

273

274

275

## 276 LITERATURE CITED

- 277 Alverson, A. J., X. Wei, D. W. Rice, D. B. Stern, K. Barry *et al.*, 2010  
278 Insights into the evolution of mitochondrial genome size from complete  
279 sequences of *Citrullus lanatus* and *Cucurbita pepo* (Cucurbitaceae). *Mol.*  
280 *Biol. Evol.* 27: 1436-1448. <https://doi.org/10.1093/molbev/msq029>
- 281 Banerjee, B., 1992 Botanical classification of tea. Chapman and Hall, London  
282 pp. 25-51. [https://doi.org/10.1007/978-94-011-2326-6\\_2](https://doi.org/10.1007/978-94-011-2326-6_2)
- 283 Boetzer, M., C. V. Henkel, H. J. Jansen, D. Butler, W. Pirovano, 2011  
284 Scaffolding pre-assembled contigs using SSPACE. *Bioinformatics* 27: 578-  
285 579. <https://doi.org/10.1093/bioinformatics/btq683>
- 286 Chaw, S. M., A. C. Shih, D. Wang, Y. W. Wu, S. M. Liu *et al.*, 2008  
287 The mitochondrial genome of the gymnosperm *Cycas taitungensis* contains  
288 a novel family of shortinterspersed elements, Bpu sequences, and abundant  
289 RNA editing sites. *Mol. Biol. Evol.* 25: 603-615. [https://doi.org/10.1093/mol](https://doi.org/10.1093/molbev/msn009)  
290 [bev/msn009](https://doi.org/10.1093/molbev/msn009)
- 291 Grewe, F., P. P. Edger, I. Keren, L. Sultan, J. C. Pires *et al.*, 2014 Com-  
292 parative analysis of 11 Brassicales mitochondrial genomes and the mito-  
293 chondrial transcriptome of *Brassica oleracea*. *Mitochondrion* 19 Pt B: 135-  
294 143. <https://doi.org/10.1016/j.mito.2014.05.008>
- 295 Huang, H., C. Shi, Y. Liu, S. Y. Mao, L. Z. Gao, 2014 Thirteen *Camellia*  
296 chloroplast genome sequences determined by high-throughput sequencing:  
297 genome structure and phylogenetic relationships. *BMC Evol. Biol.* 14: 151.  
298 <https://doi.org/10.1186/1471-2148-14-151>
- 299 Jansen, R. K., Z. Cai, L. A. Raubeson, H. Daniell, C. W. DePamphilis *et al.*,  
300 2007 Analysis of 81 genes from 64 plastid genomes resolves relation-  
301 ships in angiosperms and identifies genome-scale evolutionary patterns.  
302 *Proceedings of the National Academy of Sciences* 104: 19369. [https://doi.org](https://doi.org/10.1073/pnas.0709121104)  
303 [/10.1073/pnas.0709121104](https://doi.org/10.1073/pnas.0709121104)
- 304 Kumar, S., G. Stecher, and K. Tamura, 2016 MEGA7: Molecular Evolu-  
305 tionary Genetics Analysis Version 7.0 for Bigger Datasets. *Mol. Biol. Evol.*  
306 33: 1870-1874. <https://doi.org/10.1093/molbev/msw054>
- 307 Kurtz, S., J. V. Choudhuri, E. Ohlebusch, C. Schleiermacher, J. Stoye *et al.*,  
308 2001 REPuter: the manifold applications of repeat analysis on a genomic  
309 scale. *Nucleic Acids Res.* 29: 4633-4642. [https://doi.org/10.1093/nar/29.22.46](https://doi.org/10.1093/nar/29.22.4633)  
310 [33](https://doi.org/10.1093/nar/29.22.4633)
- 311 Langmead, B., C. Trapnell, M. Pop, S. L. Salzberg, 2009 Ultrafast and me-  
312 mory-efficient alignment of short DNA sequences to the human genome.  
313 *Genome Biol* 10: R25. <https://doi.org/10.1186/gb-2009-10-3-r25>
- 314 Larkin, M. A., G. Blackshields, N. P. Brown, R. Chenna, P. A. McGettigan *et*  
315 *al.*, 2007 Clustal W and Clustal X version 2.0. *Bioinformatics* 23: 2947-  
316 2948. <https://doi.org/10.1093/bioinformatics/btm404>
- 317 Lohse, M., O. Drechsel, and R. Bock, 2007 OrganellarGenomeDRAW (OGDRA

- 318 W): a tool for the easy generation of high-quality custom graphical maps  
319 of plastid and mitochondrial genomes. *Curr. Genet.* 52: 267-274. <https://doi.org/10.1007/s00294-007-0161-y>  
320
- 321 Lowe, T. M., and S. R. Eddy, 1997 tRNAscan-SE: a program for improved  
322 detection of transfer RNA genes in genomic sequence. *Nucleic Acids Res.*  
323 25: 955-964. <https://doi.org/10.1093/nar/25.5.0955>
- 324 Lu, H., W. Jiang, M. Ghiassi, S. Lee, M. Nitin, 2012 Classification of Came-  
325 lliia (Theaceae) Species Using Leaf Architecture Variations and Pattern  
326 Recognition Techniques. *PLoS One* 7: e29704. <https://doi.org/10.1371/journal.pone.0029704>  
327
- 328 Luo, R., B. Liu, Y. Xie, Z. Li, W. Huang *et al.*, 2012 SOAPdenovo2: an  
329 empirically improved memory-efficient short-read *de novo* assembler.  
330 *Gigascience* 1: 18. <https://doi.org/10.1186/2047-217X-1-18>
- 331 Marechal, A., and N. Brisson, 2010 Recombination and the maintenance of  
332 plant organelle genome stability. *New Phytol* 186: 299-317. <https://doi.org/10.1111/j.1469-8137.2010.03195.x>  
333
- 334 Mccauley, D. E., J. E. Stevens, P. A. Peroni, J. A. Raveill, 1996 The Spatial  
335 Distribution of Chloroplast DNA and Allozyme Polymorphisms within a  
336 Population of *Silene alba* (Caryophyllaceae). *Am. J. Bot.* 83: 727-731.  
337 <https://doi.org/10.2307/2445849>
- 338 Ming, T., and B. Bartholomew, 2007 Theaceae. In *Flora of China*.  
339 Beijing and St. Louis: Science Press and Missouri Botanical Garden. pp.  
340 367-412. [http://www.efloras.org/florataxon.aspx?flora\\_id=2&taxon\\_id=10882](http://www.efloras.org/florataxon.aspx?flora_id=2&taxon_id=10882)
- 341 Mondal, T. K., A. Bhattacharya, M. Laxmikumar, P. Singh Ahuja, 2004  
342 Recent Advances of Tea (*Camellia Sinensis*) Biotechnology. *Plant Cell,*  
343 *Tissue and Organ Culture* 76: 195-254. <https://doi.org/10.1023/B:TICU.0000009254.87882.71>  
344
- 345 Moore, M. J., P. S. Soltis, C. D. Bell, J. G. Burleigh, D. E. Soltis, 2010  
346 Phylogenetic analysis of 83 plastid genes further resolves the early diversi-  
347 fication of eudicots. *Proceedings of the National Academy of Sciences* 107:  
348 4623. <https://doi.org/10.1073/pnas.0907801107>
- 349 Mower, J. P., 2005 PREP-Mt: predictive RNA editor for plant mitochondrial  
350 genes. *BMC Bioinformatics* 6: 96. <https://doi.org/10.1186/1471-2105-6-96>
- 351 Mower, J. P., 2009 The PREP suite: predictive RNA editors for plant mito-  
352 chondrial genes, chloroplast genes and user-defined alignments. *Nucleic*  
353 *Acids Res.* 37: W253-W259. <https://doi.org/10.1093/nar/gkp337>
- 354 Palmer, J. D., and L. A. Herbon, 1988 Plant mitochondrial DNA evolves  
355 rapidly in structure, but slowly in sequence. *J. Mol. Evol.* 28: 87-97.  
356 <https://doi.org/10.1007/BF02143500>
- 357 Parks, M., R. Cronn, and A. Liston, 2009 Increasing phylogenetic resolution  
358 at low taxonomic levels using massively parallel sequencing of chloroplast  
359 genomes. *BMC Biol.* 7: 84. <https://doi.org/10.1186/1741-7007-7-84>
- 360 Porebski, S., L. G. Bailey, and B. R. Baum, 1997 Modification of a CTAB  
361 DNA extraction protocol for plants containing high polysaccharide and

- 362 polyphenol components. *Plant Mol. Biol. Rep.* 15: 8-15. <https://doi.org/10.1007/BF02772108>
- 363
- 364 Schuster, W., and A. Brennicke, 1987 Plastid, nuclear and reverse transcrip-  
365 tase sequences in the mitochondrial genome of *Oenothera*: is genetic  
366 information transferred between organelles via RNA? *Embo J.* 6: 2857-  
367 2863. <https://doi.org/10.1002/j.1460-2075.1987.tb02587.x>
- 368 Sloan, D. B., A. J. Alverson, J. P. Chuckalovcak, M. Wu, D. E. McCauley *et*  
369 *al.*, 2012 Rapid evolution of enormous, multichromosomal genomes in  
370 flowering plant mitochondria with exceptionally high mutation rates. *PLoS*  
371 *Biol.* 10: e1001241. <https://doi.org/10.1371/journal.pbio.1001241>
- 372 Small, R. L., and R. C. C. J. Wendel, 2004 Use of nuclear genes for  
373 phylogeny reconstruction in plants. *Aust. Syst. Bot.* 17: 145-170. <https://doi.org/10.1071/sb03015>
- 374
- 375 Stern, D. B., and D. M. Lonsdale, 1982 Mitochondrial and chloroplast genomes  
376 of maize have a 12-kilobase DNA sequence in common. *Nature* 299: 698-  
377 702. <https://doi.org/10.1038/299698a0>
- 378 Vaughn, J. C., M. T. Mason, G. L. Sper-Whitis, P. Kuhlman, J. D. Palmer,  
379 1995 Fungal origin by horizontal transfer of a plant mitochondrial group  
380 I intron in the chimeric CoxI gene of *Peperomia*. *J. Mol. Evol.* 41: 563.  
381 <https://doi.org/10.1007/BF00175814>
- 382 Ward, B. L., R. S. Anderson, and A. J. Bendich, 1981 The mitochondrial  
383 genome is large and variable in a family of plants (cucurbitaceae). *Cell* 25:  
384 793-803. [https://doi.org/10.1016/0092-8674\(81\)90187-2](https://doi.org/10.1016/0092-8674(81)90187-2)
- 385 Ward, G. C., and C. R. Levings, 1991 The protein-encoding gene T-urf13 is  
386 not edited in maize mitochondria. *Plant Mol. Biol.* 17: 1083-1088. <https://doi.org/10.1007/BF00037148>
- 387
- 388 Wyman, S. K., R. K. Jansen, and J. L. Boore, 2004 Automatic annotation  
389 of organellar genomes with DOGMA. *Bioinformatics* 20: 3252-3255. <https://doi.org/10.1093/bioinformatics/bth352>
- 390
- 391 Xia, E. H., H. B. Zhang, J. Sheng, K. Li, Q. J. Zhang *et al.*, 2017 The Tea  
392 Tree Genome Provides Insights into Tea Flavor and Independent Evolution  
393 of Caffeine Biosynthesis. *Mol. Plant* 10: 866-877. <https://doi.org/10.1016/j.molp.2017.04.002>
- 394
- 395 Zerbino, D. R., and E. Birney, 2008 Velvet: algorithms for *de novo* short  
396 read assembly using de Bruijn graphs. *Genome Res.* 18: 821-829. <https://doi.org/10.1101/gr.074492.107>
- 397
- 398 Zhu, A., W. Guo, K. Jain, J. P. Mower, 2014 Unprecedented heterogeneity in  
399 the synonymous substitution rate within a plant genome. *Mol. Biol. Evol.*  
400 31: 1228-1236. <https://doi.org/10.1093/molbev/msu079>

401

402

## 403 **Figure Legends**

404

405 **Figure 1. Genome map of *C. sinensis* var. *assamica* cv. *Yunkang 10*.** Genes lying  
406 outside of the outer circle are transcribed in the clockwise direction whereas genes  
407 inside are transcribed in the counterclockwise direction. Genes belonging to different  
408 functional groups are color-coded. Area dashed darker gray in the inner circle  
409 indicates GC content while the lighter gray corresponds to AT content of the  
410 genome.

411

412 **Figure 2. The assembly and annotation pipeline of the tea tree mitochondrial**  
413 **genome.**

414

415 **Figure 3. Circular map of scaffold 1 in the *C. sinensis* var. *assamica* cv. *Yunkang***  
416 ***10* mitochondrial genome.** Gene map showing 54 annotated genes with different  
417 functional groups that are color-coded on outer circle as transcribed clock-wise  
418 (outside) and transcribed counter clock-wise (inside). The inner circle indicates the  
419 GC content as dark grey plot.

420

421 **Figure 4. Circular map of scaffold 2 in the *C. sinensis* var. *assamica* cv. *Yunkang***  
422 ***10* mitochondrial genome.** Gene map showing 17 annotated genes with different  
423 functional groups that are color-coded on outer circle as transcribed clock-wise  
424 (outside) and transcribed counter clock-wise (inside). The inner circle indicates the  
425 GC content as dark grey plot.

426

427 **Figure 5. Phylogenetic relationships of 20 complete chloroplast genomes.**  
428 Maximum likelihood phylogenetic tree of *C. sinensis* var. *assamica* cv. *Yunkang 10*  
429 with 18 species in the genus *Camellia* based on complete chloroplast genome  
430 sequences. The chloroplast sequence of *Apterosperma oblata* was set as outgroup.  
431 The position of *C. sinensis* var. *assamica* cv. *Yunkang 10* is shown in bold and  
432 bootstrap values are shown for each node.

433

434 **Figure 6. Phylogeny inferred from 13 genes common in the 15 plant**  
435 **mitochondrial genomes.** Neighbor-joining tree of *C. sinensis* var. *assamica* cv.  
436 *Yunkang 10* with other 14 species based on 13 conserved protein-coding gene  
437 sequences with bootstrap support values on each node. The mt sequence of *Cycas*  
438 *taitungensis* and *Ginkgo biloba* were set as outgroup.

439

#### 440 **Supplementary Legends**

441 **Supplementary Table 1 List of the 15 plant mitochondrial genome sequences**  
442 **used for phylogenetic analysis.**



443 **Table 1. Gene annotation of the *C. sinensis* var. *assamica* cp genome.**

444

| Category                                           | Group                               | Genes                                                                                                                                                                                                                                                                                                                                                                                                                                                                                                                                                                        |
|----------------------------------------------------|-------------------------------------|------------------------------------------------------------------------------------------------------------------------------------------------------------------------------------------------------------------------------------------------------------------------------------------------------------------------------------------------------------------------------------------------------------------------------------------------------------------------------------------------------------------------------------------------------------------------------|
| <b>Photosynthesis related genes</b>                | Rubisco                             | <i>rbcL</i>                                                                                                                                                                                                                                                                                                                                                                                                                                                                                                                                                                  |
|                                                    | Photosystem I                       | <i>psaA, psaB, psaC, psaI, psaJ</i>                                                                                                                                                                                                                                                                                                                                                                                                                                                                                                                                          |
|                                                    | Assembly/stability of Photosystem I | <i>ycf3</i>                                                                                                                                                                                                                                                                                                                                                                                                                                                                                                                                                                  |
|                                                    | Photosystem II                      | <i>psbA, psbB, psbT, psbK, psbI, psbH, psbM, psbN, psbD, psbC, psbZ, psbJ, psbL, psbE, psbF</i>                                                                                                                                                                                                                                                                                                                                                                                                                                                                              |
|                                                    | ATP synthase                        | <i>atpA, atpB, atpE, atpF, atpH, atpI</i>                                                                                                                                                                                                                                                                                                                                                                                                                                                                                                                                    |
|                                                    | Cytochrome complem                  | b/f <i>petA, petB, petD, petN, petL, petG</i>                                                                                                                                                                                                                                                                                                                                                                                                                                                                                                                                |
|                                                    | Cytochrome csynthesis               | <i>ccsA</i>                                                                                                                                                                                                                                                                                                                                                                                                                                                                                                                                                                  |
|                                                    | NADPH dehydrogenase                 | <i>ndhA, ndhB</i> (×2), <i>ndhC, ndhD, ndhE, ndhF, ndhH, ndhG, ndhJ, ndhK, ndhI</i>                                                                                                                                                                                                                                                                                                                                                                                                                                                                                          |
| <b>Transcription and translation related genes</b> | Transcription                       | <i>rpoA, rpoC2, rpoC1, rpoB</i><br><i>rps2, rps3, rps4, rps7</i> (×2), <i>rps8, rps11, rps12, rps14, rps15, rps16, rps18, rps19, rpl2</i> (×2), <i>rpl14, rpl16, rpl20, rpl22, rpl23</i> (×2), <i>rpl32, rpl33, rpl36</i>                                                                                                                                                                                                                                                                                                                                                    |
|                                                    | Ribosomal proteins                  |                                                                                                                                                                                                                                                                                                                                                                                                                                                                                                                                                                              |
|                                                    | Translation initiation factor       | <i>infA</i>                                                                                                                                                                                                                                                                                                                                                                                                                                                                                                                                                                  |
| <b>RNA genes</b>                                   | Ribosomal RNA                       | <i>rrn16S</i> (×2), <i>rrn23S</i> (×2), <i>rrn4.5</i> (×2), <i>rrn5</i> (×2)<br><i>trnH-GUG, trnK-UUU</i> (×2), <i>trnQ-UUG, trnS-GCU, trnG-UCC</i> (×2), <i>trnR-UCU, trnC-GCA, trnD-GUC, trnY-GUA, trnE-UUC, trnT-GGU, trnS-UGA, trnG-UCC, trnfm-CAU, trnS-GGA, trnT-UGU, trnL-UAA</i> (×2), <i>trnF-GAA, trnV-UAC</i> (×2), <i>trnM-CAU, trnW-CCA, trnP-UGG, trnI-CAU, trnL-CAA</i> (×2), <i>trnV-GAC, trnI-GAU</i> (×3), <i>trnA-UGC</i> (×2), <i>trnR-ACG</i> (×2), <i>trnN-GUU</i> (×2), <i>trnL-UAG, trnN-GUU, trnR-ACG, trnA-UGC</i> (×2), <i>trnV-GAC, trnI-CAU</i> |
|                                                    | Transfer RNA                        |                                                                                                                                                                                                                                                                                                                                                                                                                                                                                                                                                                              |
| <b>Other genes</b>                                 | RNA processing                      | <i>matK</i>                                                                                                                                                                                                                                                                                                                                                                                                                                                                                                                                                                  |
|                                                    | Carbon metabolism                   | <i>cemA</i>                                                                                                                                                                                                                                                                                                                                                                                                                                                                                                                                                                  |
|                                                    | Fatty acid synthesis                | <i>accD</i>                                                                                                                                                                                                                                                                                                                                                                                                                                                                                                                                                                  |
|                                                    | Proteolysis                         | <i>clpP</i>                                                                                                                                                                                                                                                                                                                                                                                                                                                                                                                                                                  |
| <b>Genes of unknown function</b>                   | Conserved ORFs                      | <i>ycf1</i> (×2), <i>cf2, ycf4, ycf2, ycf15</i> (×2)                                                                                                                                                                                                                                                                                                                                                                                                                                                                                                                         |

445

446



447 **Table 2. Gene content of of the *C. sinensis* var. *assamica* mt genome.**

448

| Group of genes                   | Name of genes                                                           |                                         |
|----------------------------------|-------------------------------------------------------------------------|-----------------------------------------|
|                                  | Scaffold 1                                                              | Scaffold 2                              |
|                                  | <i>nad1, nad2, nad3, nad4,</i>                                          |                                         |
| <b>Complex I</b>                 | <i>nad4L, nad5, nad6, nad7,</i>                                         | <i>nad1, nad2</i>                       |
|                                  | <i>nad9 (×2)</i>                                                        |                                         |
| <b>Complex II</b>                | <i>sdh3, sdh4</i>                                                       | <i>sdh3</i>                             |
| <b>Complex III</b>               |                                                                         | <i>cob</i>                              |
| <b>Complex IV</b>                | <i>cox1, cox2, cox3</i>                                                 |                                         |
| <b>Complex V</b>                 | <i>atp1, atp4, atp6, atp8, atp9</i>                                     | <i>atp9</i>                             |
| <b>Cytochrome c biogenesis</b>   | <i>ccmFn, ccmB, ccmC</i>                                                | <i>ccmFc</i>                            |
| <b>Ribosome large subunit</b>    | <i>rpl2, rpl10, rpl16</i>                                               | <i>rpl5</i>                             |
| <b>Ribosome small subunit</b>    | <i>rps1, rps3, rps4, rps7, rps12,</i><br><i>rps13, rps19</i>            | <i>rps14, rps19</i>                     |
| <b>rRNA genes</b>                | <i>rrn5, rrn18, rrn16</i>                                               |                                         |
|                                  | <i>trnS(Ser), trnD(Asp),</i>                                            |                                         |
|                                  | <i>trnK(Lys), trnfM(Met) (×2),</i>                                      |                                         |
|                                  | <i>trnI(Ile)-cp, trnE(Glu),</i>                                         | <i>trnI(Ile), trnM(Met)-cp,</i>         |
| <b>tRNA genes</b>                | <i>trnH(His)-cp, trnP(Pro),</i>                                         | <i>trnC(Cys), trnN(Asn)-cp,</i>         |
|                                  | <i>trnW(Trp)-cp, trnG(Gly),</i>                                         | <i>trnY(Tyr), trnS(Ser), trnF(Phe),</i> |
|                                  | <i>trnQ(Gln), trnC(Cys),</i>                                            | <i>trnP(Pro)</i>                        |
|                                  | <i>trnD(Asp), trnS(Ser),</i>                                            |                                         |
|                                  | <i>trnV(Val)-cp</i>                                                     |                                         |
| <b>chloroplast-derived genes</b> | <i>trnI(Ile)-cp, trnH(His)-cp,</i><br><i>trnW(Trp)-cp, trnV(Val)-cp</i> | <i>trnM(Met)-cp, trnN(Asn)-cp</i>       |
| <b>Other proteins</b>            | <i>matR, mttB</i>                                                       |                                         |

449

450

451 **Table 3. Statistics of SSR motifs in the *C. sinensis* var. *assamica* mt and cp**  
452 **genomes.**

453

| SSR-Motif       | mt Genome  |       | cp Genome  |       |
|-----------------|------------|-------|------------|-------|
|                 | SSR Number | SSR % | SSR Number | SSR % |
| <b>Monomer</b>  | 210        | 31.53 | 160        | 74.42 |
| <b>Dimer</b>    | 302        | 45.35 | 41         | 19.07 |
| <b>Trimer</b>   | 33         | 4.95  | 1          | 0.47  |
| <b>Tetramer</b> | 101        | 15.17 | 10         | 4.65  |
| <b>Pentamer</b> | 18         | 2.70  | 0          | 0.00  |
| <b>Hexamer</b>  | 1          | 0.15  | 2          | 0.93  |

454

455

456 **Table 4. Long repeats (repeat unit > 50 bp) in the *C. sinensis* var. *assamica* cp**  
457 **genome\*.**

458

| Repeat Length | Type | Start of Copy 1 | Start of Copy 2 |
|---------------|------|-----------------|-----------------|
| 56            | F    | 93938           | 93956           |
| 56            | P    | 93938           | 149737          |
| 56            | P    | 93956           | 149755          |
| 56            | F    | 149737          | 149755          |

459

\* P indicates palindromic repeats; F indicates forward repeats.

460

Overlapped repeats have been manually removed while calculating total length.

461

462 **Table 5. Long repeats (repeat unit > 50 bp) in the *C. sinensis* var. *assamica* mt**  
463 **genome\*.**

464 **Scaffold 1**

| <b>Repeat Length</b> | <b>Type</b> | <b>Start of Copy 2</b> | <b>Start of Copy 1</b> |
|----------------------|-------------|------------------------|------------------------|
| 5119                 | F           | 207173                 | 443366                 |
| 2191                 | F           | 389017                 | 391244                 |
| 1963                 | F           | 210330                 | 212292                 |
| 1962                 | F           | 212292                 | 446523                 |
| 1930                 | F           | 383226                 | 385188                 |
| 1650                 | F           | 205522                 | 207173                 |
| 1650                 | F           | 205522                 | 443366                 |
| 1469                 | F           | 538290                 | 539780                 |
| 814                  | F           | 496567                 | 498047                 |
| 705                  | F           | 619432                 | 621461                 |
| 665                  | F           | 497382                 | 498862                 |
| 255                  | P           | 151984                 | 200526                 |
| 228                  | P           | 448476                 | 544136                 |
| 204                  | F           | 277002                 | 363807                 |
| 131                  | P           | 73675                  | 482324                 |
| 125                  | F           | 301855                 | 468834                 |
| 104                  | F           | 297204                 | 623713                 |
| 88                   | F           | 228824                 | 559689                 |
| 87                   | F           | 594334                 | 641398                 |
| 84                   | F           | 530415                 | 646532                 |
| 82                   | P           | 224027                 | 395044                 |
| 82                   | F           | 509347                 | 623862                 |
| 81                   | P           | 152363                 | 200041                 |
| 80                   | F           | 304361                 | 306020                 |
| 78                   | P           | 299987                 | 587603                 |

---

|    |   |        |        |
|----|---|--------|--------|
| 74 | F | 165777 | 570981 |
| 70 | F | 165878 | 571083 |
| 69 | F | 123050 | 384677 |
| 69 | F | 123050 | 386639 |
| 67 | F | 18495  | 27472  |
| 66 | F | 299782 | 537227 |
| 66 | P | 364849 | 599005 |
| 66 | F | 684228 | 684285 |
| 65 | P | 508609 | 683320 |
| 64 | F | 542385 | 560020 |
| 63 | F | 605770 | 619261 |
| 62 | P | 70098  | 424512 |
| 62 | F | 151516 | 524252 |
| 62 | P | 156839 | 486845 |
| 61 | F | 123120 | 384747 |
| 61 | F | 123120 | 386709 |
| 61 | P | 142673 | 486240 |
| 60 | F | 302012 | 395122 |
| 59 | P | 265260 | 472040 |
| 58 | F | 285626 | 402303 |
| 57 | P | 152478 | 199950 |
| 57 | F | 276881 | 363698 |
| 56 | F | 402376 | 658389 |
| 55 | P | 41703  | 667438 |
| 55 | F | 258578 | 486959 |

---

465

466 \* P indicates palindromic repeats; F indicates forward repeats. Overlapped repeats have

467 been manually removed while calculating total length.

468

469

470 **Scaffold 2**

| <b>Repeat Length</b> | <b>Type</b> | <b>Start of Copy 1</b> | <b>Start of Copy 2</b> |
|----------------------|-------------|------------------------|------------------------|
| 704                  | F           | 30739                  | 32294                  |
| 156                  | P           | 29085                  | 67620                  |
| 86                   | F           | 67291                  | 136332                 |
| 67                   | P           | 4255                   | 17574                  |
| 67                   | P           | 23998                  | 45730                  |
| 62                   | F           | 67282                  | 135282                 |
| 55                   | F           | 120664                 | 129253                 |
| 53                   | F           | 135291                 | 136332                 |

471

472 \* P indicates palindromic repeats; F indicates forward repeats. Overlapped repeats have  
473 been manually removed while calculating total length.

474

475 **Table 6. Predicted RNA-editing sites in the *C. sinensis* var. *assamica* cp genome\*.**

476 (\*The cutoff score (C-value) was set to 0.8.)

477

| No. | Gene        | Nucleotide<br>Pos | AA<br>Pos | Effect             | Score |
|-----|-------------|-------------------|-----------|--------------------|-------|
| 1   | <i>accD</i> | 64                | 22        | CGG (R) => TGG (W) | 1     |
| 2   | <i>accD</i> | 1469              | 490       | CCT (P) => CTT (L) | 1     |
| 3   | <i>atpA</i> | 791               | 264       | CCA (P) => CTA (L) | 1     |
| 4   | <i>atpA</i> | 914               | 305       | TCA (S) => TTA (L) | 1     |
| 5   | <i>atpF</i> | 92                | 31        | CCA (P) => CTA (L) | 0.86  |
| 6   | <i>atpI</i> | 134               | 45        | GCT (A) => GTT (V) | 1     |
| 7   | <i>matK</i> | 445               | 149       | CAC (H) => TAC (Y) | 1     |
| 8   | <i>matK</i> | 467               | 156       | TCG (S) => TTG (L) | 1     |
| 9   | <i>matK</i> | 631               | 211       | CAT (H) => TAT (Y) | 1     |
| 10  | <i>matK</i> | 1234              | 412       | CAT (H) => TAT (Y) | 1     |
| 11  | <i>ndhA</i> | 341               | 114       | TCA (S) => TTA (L) | 1     |
| 12  | <i>ndhA</i> | 566               | 189       | TCA (S) => TTA (L) | 1     |
| 13  | <i>ndhA</i> | 1028              | 343       | TCT (S) => TTT (F) | 1     |
| 14  | <i>ndhA</i> | 1073              | 358       | TCT (S) => TTT (F) | 1     |
| 15  | <i>ndhB</i> | 149               | 50        | TCA (S) => TTA (L) | 1     |
| 16  | <i>ndhB</i> | 467               | 156       | CCA (P) => CTA (L) | 1     |
| 17  | <i>ndhB</i> | 586               | 196       | CAT (H) => TAT (Y) | 1     |
| 18  | <i>ndhB</i> | 611               | 204       | TCA (S) => TTA (L) | 0.8   |
| 19  | <i>ndhB</i> | 737               | 246       | CCA (P) => CTA (L) | 1     |
| 20  | <i>ndhB</i> | 746               | 249       | TCT (S) => TTT (F) | 1     |
| 21  | <i>ndhB</i> | 830               | 277       | TCA (S) => TTA (L) | 1     |
| 22  | <i>ndhB</i> | 1481              | 494       | CCA (P) => CTA (L) | 1     |
| 23  | <i>ndhD</i> | 20                | 7         | ACG (T) => ATG (M) | 1     |
| 24  | <i>ndhD</i> | 401               | 134       | TCA (S) => TTA (L) | 1     |
| 25  | <i>ndhD</i> | 692               | 231       | TCA (S) => TTA (L) | 1     |

|    |              |      |      |                    |      |
|----|--------------|------|------|--------------------|------|
| 26 | <i>ndhD</i>  | 896  | 299  | TCA (S) => TTA (L) | 1    |
| 27 | <i>ndhD</i>  | 905  | 302  | CCT (P) => CTT (L) | 1    |
| 28 | <i>ndhD</i>  | 1328 | 443  | TCA (S) => TTA (L) | 0.8  |
| 29 | <i>ndhF</i>  | 205  | 69   | CAT (H) => TAT (Y) | 0.8  |
| 30 | <i>ndhF</i>  | 290  | 97   | TCA (S) => TTA (L) | 1    |
| 31 | <i>ndhG</i>  | 166  | 56   | CAT (H) => TAT (Y) | 0.8  |
| 32 | <i>ndhG</i>  | 314  | 105  | ACA (T) => ATA (I) | 0.8  |
| 33 | <i>petB</i>  | 641  | 214  | CCA (P) => CTA (L) | 1    |
| 34 | <i>psaI</i>  | 80   | 27   | TCT (S) => TTT (F) | 0.86 |
| 35 | <i>psbE</i>  | 214  | 72   | CCT (P) => TCT (S) | 1    |
| 36 | <i>psbF</i>  | 77   | 26   | TCT (S) => TTT (F) | 1    |
| 37 | <i>rpoA</i>  | 368  | 123  | TCG (S) => TTG (L) | 1    |
| 38 | <i>rpoB</i>  | 338  | 113  | TCT (S) => TTT (F) | 1    |
| 39 | <i>rpoB</i>  | 473  | 158  | TCA (S) => TTA (L) | 0.86 |
| 40 | <i>rpoB</i>  | 551  | 184  | TCA (S) => TTA (L) | 1    |
| 41 | <i>rpoB</i>  | 566  | 189  | TCG (S) => TTG (L) | 1    |
| 42 | <i>rpoB</i>  | 973  | 325  | CTT (L) => TTT (F) | 0.86 |
| 43 | <i>rpoB</i>  | 2000 | 667  | TCT (S) => TTT (F) | 1    |
| 44 | <i>rpoB</i>  | 2336 | 779  | ACA (T) => ATA (I) | 1    |
| 45 | <i>rpoC1</i> | 41   | 14   | TCA (S) => TTA (L) | 1    |
| 46 | <i>rpoC1</i> | 1556 | 519  | TCG (S) => TTG (L) | 1    |
| 47 | <i>rpoC2</i> | 1505 | 502  | ACG (T) => ATG (M) | 0.86 |
| 48 | <i>rpoC2</i> | 2290 | 764  | CGG (R) => TGG (W) | 1    |
| 49 | <i>rpoC2</i> | 2726 | 909  | ACT (T) => ATT (I) | 1    |
| 50 | <i>rpoC2</i> | 3728 | 1243 | TCA (S) => TTA (L) | 0.86 |
| 51 | <i>rps2</i>  | 248  | 83   | TCA (S) => TTA (L) | 1    |
| 52 | <i>rps8</i>  | 182  | 61   | TCA (S) => TTA (L) | 0.86 |
| 53 | <i>rps14</i> | 80   | 27   | TCA (S) => TTA (L) | 1    |
| 54 | <i>rps14</i> | 149  | 50   | CCA (P) => CTA (L) | 1    |



478 **Table 7. Predicted RNA-editing sites in Scaffold 1 of the *C. sinensis* var.**

479 *assamica* mt genome\*.

480

| No. | Gene         | Nucleotide Position | AA Pos | Effect             | Score |
|-----|--------------|---------------------|--------|--------------------|-------|
| 1   | <i>matR</i>  | 32                  | 11     | TCC (S) => TTC (F) | 0.62  |
| 2   | <i>matR</i>  | 236                 | 79     | TCC (S) => TTC (F) | 0.62  |
| 3   | <i>matR</i>  | 326                 | 109    | CCA (P) => CTA (L) | 1     |
| 4   | <i>matR</i>  | 917                 | 306    | TCA (S) => TTA (L) | 1     |
| 5   | <i>matR</i>  | 1442                | 481    | GCC (A) => GTC (V) | 0.62  |
| 6   | <i>matR</i>  | 1667                | 556    | TCC (S) => TTC (F) | 1     |
| 7   | <i>matR</i>  | 1688                | 563    | CCT (P) => CTT (L) | 1     |
| 8   | <i>matR</i>  | 1708                | 570    | CGC (R) => TGC (C) | 1     |
| 9   | <i>matR</i>  | 1744                | 582    | CAC (H) => TAC (Y) | 1     |
| 10  | <i>matR</i>  | 1775                | 592    | CCG (P) => CTG (L) | 1     |
| 11  | <i>matR</i>  | 1814                | 605    | CCA (P) => CTA (L) | 0.88  |
| 12  | <i>matR</i>  | 1832                | 611    | TCA (S) => TTA (L) | 0.88  |
| 13  | <i>ccmFn</i> | 38                  | 13     | CCG (P) => CTG (L) | 1     |
| 14  | <i>ccmFn</i> | 98                  | 33     | CCT (P) => CTT (L) | 1     |
| 15  | <i>ccmFn</i> | 137                 | 46     | TCG (S) => TTG (L) | 1     |
| 16  | <i>ccmFn</i> | 142                 | 48     | CGT (R) => TGT (C) | 1     |
| 17  | <i>ccmFn</i> | 151                 | 51     | CCT (P) => TCT (S) | 0.83  |
| 18  | <i>ccmFn</i> | 248                 | 83     | TCA (S) => TTA (L) | 1     |
| 19  | <i>ccmFn</i> | 256                 | 86     | CGG (R) => TGG (W) | 1     |
| 20  | <i>ccmFn</i> | 283                 | 95     | CTT (L) => TTT (F) | 0.83  |
| 21  | <i>ccmFn</i> | 334                 | 112    | CAT (H) => TAT (Y) | 0.67  |
| 22  | <i>ccmFn</i> | 356                 | 119    | TCC (S) => TTC (F) | 0.67  |
| 23  | <i>ccmFn</i> | 391                 | 131    | CCT (P) => TCT (S) | 1     |
| 24  | <i>ccmFn</i> | 478                 | 160    | CGT (R) => TGT (C) | 0.83  |

|    |              |      |     |                    |      |
|----|--------------|------|-----|--------------------|------|
| 25 | <i>ccmFn</i> | 706  | 236 | CCT (P) => TTT (F) | 0.67 |
| 26 | <i>ccmFn</i> | 707  | 236 | CCT (P) => TTT (F) | 0.67 |
| 27 | <i>ccmFn</i> | 716  | 239 | TCA (S) => TTA (L) | 0.83 |
| 28 | <i>ccmFn</i> | 754  | 252 | CGT (R) => TGT (C) | 1    |
| 29 | <i>ccmFn</i> | 776  | 259 | TCA (S) => TTA (L) | 1    |
| 30 | <i>ccmFn</i> | 788  | 263 | CCA (P) => CTA (L) | 1    |
| 31 | <i>ccmFn</i> | 803  | 268 | TCA (S) => TTA (L) | 1    |
| 32 | <i>ccmFn</i> | 893  | 298 | GCG (A) => GTG (V) | 1    |
| 33 | <i>ccmFn</i> | 952  | 318 | CGC (R) => TGC (C) | 1    |
| 34 | <i>ccmFn</i> | 1270 | 424 | CGG (R) => TGG (W) | 1    |
| 35 | <i>ccmFn</i> | 1298 | 433 | CCA (P) => CTA (L) | 1    |
| 36 | <i>ccmFn</i> | 1315 | 439 | CAT (H) => TAT (Y) | 1    |
| 37 | <i>ccmFn</i> | 1330 | 444 | CGG (R) => TGG (W) | 1    |
| 38 | <i>ccmFn</i> | 1348 | 450 | CGG (R) => TGG (W) | 1    |
| 39 | <i>ccmFn</i> | 1381 | 461 | CGG (R) => TGG (W) | 1    |
| 40 | <i>ccmFn</i> | 1399 | 467 | CGT (R) => TGT (C) | 1    |
| 41 | <i>ccmFn</i> | 1442 | 481 | TCG (S) => TTG (L) | 1    |
| 42 | <i>ccmFn</i> | 1462 | 488 | CTT (L) => TTT (F) | 1    |
| 43 | <i>ccmFn</i> | 1466 | 489 | CCA (P) => CTA (L) | 1    |
| 44 | <i>ccmFn</i> | 1478 | 493 | TCA (S) => TTA (L) | 1    |
| 45 | <i>ccmFn</i> | 1487 | 496 | TCT (S) => TTT (F) | 1    |
| 46 | <i>ccmFn</i> | 1513 | 505 | CCC (P) => TCC (S) | 1    |
| 47 | <i>ccmFn</i> | 1561 | 521 | CGG (R) => TGG (W) | 0.67 |
| 48 | <i>nad5</i>  | 155  | 52  | CCG (P) => CTG (L) | 1    |
| 49 | <i>nad5</i>  | 238  | 80  | CCG (P) => TCG (S) | 0.8  |
| 50 | <i>nad5</i>  | 269  | 90  | TCC (S) => TTC (F) | 0.7  |
| 51 | <i>nad5</i>  | 355  | 119 | CCT (P) => TTT (F) | 1    |
| 52 | <i>nad5</i>  | 356  | 119 | CCT (P) => TTT (F) | 1    |
| 53 | <i>nad5</i>  | 371  | 124 | CCA (P) => CTA (L) | 0.9  |

|    |             |      |     |                    |      |
|----|-------------|------|-----|--------------------|------|
| 54 | <i>nad5</i> | 395  | 132 | TCT (S) => TTT (F) | 0.9  |
| 55 | <i>nad5</i> | 503  | 168 | CCT (P) => CTT (L) | 1    |
| 56 | <i>nad5</i> | 536  | 179 | CCT (P) => CTT (L) | 1    |
| 57 | <i>nad5</i> | 626  | 209 | TCT (S) => TTT (F) | 0.9  |
| 58 | <i>nad5</i> | 628  | 210 | CGC (R) => TGC (C) | 0.9  |
| 59 | <i>nad5</i> | 673  | 225 | CTT (L) => TTT (F) | 0.9  |
| 60 | <i>nad5</i> | 710  | 237 | TCG (S) => TTG (L) | 1    |
| 61 | <i>nad5</i> | 722  | 241 | TCA (S) => TTA (L) | 1    |
| 62 | <i>nad5</i> | 832  | 278 | CCA (P) => TCA (S) | 0.9  |
| 63 | <i>nad5</i> | 872  | 291 | ACG (T) => ATG (M) | 1    |
| 64 | <i>nad5</i> | 1307 | 436 | TCA (S) => TTA (L) | 1    |
| 65 | <i>nad4</i> | 29   | 10  | TCC (S) => TTC (F) | 0.67 |
| 66 | <i>nad4</i> | 74   | 25  | ACT (T) => ATT (I) | 0.89 |
| 67 | <i>nad4</i> | 77   | 26  | CCT (P) => CTT (L) | 0.78 |
| 68 | <i>nad4</i> | 107  | 36  | CCG (P) => CTG (L) | 1    |
| 69 | <i>nad4</i> | 154  | 52  | CCC (P) => TCC (S) | 1    |
| 70 | <i>nad4</i> | 158  | 53  | CCT (P) => CTT (L) | 1    |
| 71 | <i>nad4</i> | 166  | 56  | CGG (R) => TGG (W) | 1    |
| 72 | <i>nad4</i> | 197  | 66  | TCT (S) => TTT (F) | 1    |
| 73 | <i>nad4</i> | 362  | 121 | ACA (T) => ATA (I) | 0.89 |
| 74 | <i>nad4</i> | 368  | 123 | TCT (S) => TTT (F) | 1    |
| 75 | <i>nad4</i> | 376  | 126 | CGT (R) => TGT (C) | 0.78 |
| 76 | <i>nad4</i> | 403  | 135 | CGC (R) => TGC (C) | 1    |
| 77 | <i>nad4</i> | 416  | 139 | CCT (P) => CTT (L) | 0.89 |
| 78 | <i>nad4</i> | 433  | 145 | CTT (L) => TTT (F) | 1    |
| 79 | <i>nad4</i> | 436  | 146 | CCC (P) => TTC (F) | 0.89 |
| 80 | <i>nad4</i> | 437  | 146 | CCC (P) => TTC (F) | 0.89 |
| 81 | <i>nad4</i> | 449  | 150 | CCA (P) => CTA (L) | 1    |
| 82 | <i>nad4</i> | 547  | 183 | CTC (L) => TTC (F) | 0.67 |

|     |             |      |     |                    |      |
|-----|-------------|------|-----|--------------------|------|
| 83  | <i>nad4</i> | 1336 | 446 | CAC (H) => TAC (Y) | 1    |
| 84  | <i>nad4</i> | 1352 | 451 | CCG (P) => CTG (L) | 1    |
| 85  | <i>nad4</i> | 1357 | 453 | CGC (R) => TGC (C) | 1    |
| 86  | <i>atp6</i> | 37   | 13  | CCA (P) => TCA (S) | 0.75 |
| 87  | <i>atp6</i> | 116  | 39  | TCA (S) => TTA (L) | 1    |
| 88  | <i>atp6</i> | 167  | 56  | CCG (P) => CTG (L) | 1    |
| 89  | <i>atp6</i> | 173  | 58  | CCG (P) => CTG (L) | 1    |
| 90  | <i>atp6</i> | 224  | 75  | TCC (S) => TTC (F) | 1    |
| 91  | <i>atp6</i> | 229  | 77  | CGC (R) => TGC (C) | 0.75 |
| 92  | <i>atp6</i> | 236  | 79  | TCG (S) => TTG (L) | 0.67 |
| 93  | <i>atp6</i> | 254  | 85  | TCG (S) => TTG (L) | 1    |
| 94  | <i>atp6</i> | 262  | 88  | CGT (R) => TGT (C) | 1    |
| 95  | <i>atp6</i> | 269  | 90  | CCC (P) => CTC (L) | 1    |
| 96  | <i>atp6</i> | 401  | 134 | TCA (S) => TTA (L) | 1    |
| 97  | <i>atp6</i> | 460  | 154 | CCT (P) => TCT (S) | 1    |
| 98  | <i>atp6</i> | 463  | 155 | CAT (H) => TAT (Y) | 1    |
| 99  | <i>atp6</i> | 485  | 162 | CCA (P) => CTA (L) | 1    |
| 100 | <i>atp6</i> | 527  | 176 | TCA (S) => TTA (L) | 1    |
| 101 | <i>atp6</i> | 548  | 183 | TCC (S) => TTC (F) | 1    |
| 102 | <i>atp6</i> | 635  | 212 | CCG (P) => CTG (L) | 1    |
| 103 | <i>atp6</i> | 656  | 219 | TCA (S) => TTA (L) | 1    |
| 104 | <i>atp6</i> | 664  | 222 | CAT (H) => TAT (Y) | 1    |
| 105 | <i>atp6</i> | 671  | 224 | TCT (S) => TTT (F) | 1    |
| 106 | <i>atp6</i> | 680  | 227 | TCA (S) => TTA (L) | 1    |
| 107 | <i>atp6</i> | 707  | 236 | ACA (T) => ATA (I) | 0.92 |
| 108 | <i>atp6</i> | 718  | 240 | CAA (Q) => TAA (X) | 1    |
| 109 | <i>mttB</i> | 58   | 20  | CAT (H) => TAT (Y) | 0.88 |
| 110 | <i>mttB</i> | 83   | 28  | TCG (S) => TTG (L) | 0.88 |
| 111 | <i>mttB</i> | 91   | 31  | CCA (P) => TCA (S) | 1    |

|     |             |     |     |                    |      |
|-----|-------------|-----|-----|--------------------|------|
| 112 | <i>mttB</i> | 127 | 43  | CGT (R) => TGT (C) | 0.88 |
| 113 | <i>mttB</i> | 134 | 45  | CCA (P) => CTA (L) | 0.62 |
| 114 | <i>mttB</i> | 164 | 55  | TCC (S) => TTC (F) | 0.75 |
| 115 | <i>mttB</i> | 196 | 66  | CCG (P) => TCG (S) | 1    |
| 116 | <i>mttB</i> | 253 | 85  | CGT (R) => TGT (C) | 0.62 |
| 117 | <i>mttB</i> | 290 | 97  | TCT (S) => TTT (F) | 1    |
| 118 | <i>mttB</i> | 299 | 100 | TCG (S) => TTG (L) | 0.75 |
| 119 | <i>ccmB</i> | 28  | 10  | CAT (H) => TAT (Y) | 0.89 |
| 120 | <i>ccmB</i> | 43  | 15  | CCC (P) => TCC (S) | 0.67 |
| 121 | <i>ccmB</i> | 71  | 24  | CCA (P) => CTA (L) | 1    |
| 122 | <i>ccmB</i> | 80  | 27  | TCG (S) => TTG (L) | 1    |
| 123 | <i>ccmB</i> | 128 | 43  | TCA (S) => TTA (L) | 1    |
| 124 | <i>ccmB</i> | 137 | 46  | TCC (S) => TTC (F) | 1    |
| 125 | <i>ccmB</i> | 149 | 50  | CCG (P) => CTG (L) | 1    |
| 126 | <i>ccmB</i> | 154 | 52  | CGG (R) => TGG (W) | 1    |
| 127 | <i>ccmB</i> | 160 | 54  | CCT (P) => TCT (S) | 0.67 |
| 128 | <i>ccmB</i> | 164 | 55  | CCG (P) => CTG (L) | 0.89 |
| 129 | <i>ccmB</i> | 172 | 58  | CCT (P) => TCT (S) | 0.89 |
| 130 | <i>ccmB</i> | 179 | 60  | CCT (P) => CTT (L) | 1    |
| 131 | <i>ccmB</i> | 193 | 65  | CCT (P) => TTT (F) | 0.89 |
| 132 | <i>ccmB</i> | 194 | 65  | CCT (P) => TTT (F) | 0.89 |
| 133 | <i>ccmB</i> | 286 | 96  | CGG (R) => TGG (W) | 1    |
| 134 | <i>ccmB</i> | 304 | 102 | CGT (R) => TGT (C) | 0.78 |
| 135 | <i>ccmB</i> | 313 | 105 | CGT (R) => TGT (C) | 0.89 |
| 136 | <i>ccmB</i> | 338 | 113 | CCG (P) => CTG (L) | 1    |
| 137 | <i>ccmB</i> | 367 | 123 | CGG (R) => TGG (W) | 0.78 |
| 138 | <i>ccmB</i> | 424 | 142 | CGT (R) => TGT (C) | 0.89 |
| 139 | <i>ccmB</i> | 428 | 143 | TCG (S) => TTG (L) | 1    |
| 140 | <i>ccmB</i> | 467 | 156 | TCG (S) => TTG (L) | 0.89 |

|     |              |      |     |                    |      |
|-----|--------------|------|-----|--------------------|------|
| 141 | <i>ccmB</i>  | 476  | 159 | CCA (P) => CTA (L) | 0.89 |
| 142 | <i>ccmB</i>  | 485  | 162 | TCA (S) => TTA (L) | 1    |
| 143 | <i>ccmB</i>  | 494  | 165 | TCA (S) => TTA (L) | 1    |
| 144 | <i>ccmB</i>  | 503  | 168 | CCA (P) => CTA (L) | 1    |
| 145 | <i>ccmB</i>  | 512  | 171 | TCT (S) => TTT (F) | 1    |
| 146 | <i>ccmB</i>  | 514  | 172 | CGT (R) => TGT (C) | 1    |
| 147 | <i>ccmB</i>  | 551  | 184 | TCA (S) => TTA (L) | 1    |
| 148 | <i>ccmB</i>  | 554  | 185 | TCG (S) => TTG (L) | 0.89 |
| 149 | <i>ccmB</i>  | 566  | 189 | TCC (S) => TTC (F) | 0.78 |
| 150 | <i>ccmB</i>  | 569  | 190 | TCT (S) => TTT (F) | 0.78 |
| 151 | <i>ccmB</i>  | 572  | 191 | CCG (P) => CTG (L) | 1    |
| 152 | <i>ccmB</i>  | 596  | 199 | TCG (S) => TTG (L) | 0.89 |
| 153 | <i>rpl10</i> | 101  | 34  | TCG (S) => TTG (L) | 0.83 |
| 154 | <i>rpl10</i> | 239  | 80  | TCG (S) => TTG (L) | 0.83 |
| 155 | <i>rpl10</i> | 314  | 105 | TCA (S) => TTA (L) | 0.83 |
| 156 | <i>rps7</i>  | 152  | 51  | CCA (P) => CTA (L) | 0.75 |
| 157 | <i>rps7</i>  | 343  | 115 | CAC (H) => TAC (Y) | 0.62 |
| 158 | <i>rps7</i>  | 368  | 123 | TCA (S) => TTA (L) | 0.88 |
| 159 | <i>atp1</i>  | 1039 | 347 | CCC (P) => TCC (S) | 1    |
| 160 | <i>atp1</i>  | 1064 | 355 | TCG (S) => TTG (L) | 1    |
| 161 | <i>atp1</i>  | 1178 | 393 | TCA (S) => TTA (L) | 0.9  |
| 162 | <i>atp1</i>  | 1216 | 406 | CTT (L) => TTT (F) | 1    |
| 163 | <i>atp1</i>  | 1292 | 431 | CCG (P) => CTG (L) | 0.8  |
| 164 | <i>atp1</i>  | 1415 | 472 | CCA (P) => CTA (L) | 1    |
| 165 | <i>atp1</i>  | 1490 | 497 | CCA (P) => CTA (L) | 0.9  |
| 166 | <i>atp9</i>  | 20   | 7   | TCA (S) => TTA (L) | 1    |
| 167 | <i>atp9</i>  | 50   | 17  | TCA (S) => TTA (L) | 1    |
| 168 | <i>atp9</i>  | 82   | 28  | CTT (L) => TTT (F) | 1    |
| 169 | <i>atp9</i>  | 92   | 31  | TCG (S) => TTG (L) | 1    |

|     |              |     |     |                    |      |
|-----|--------------|-----|-----|--------------------|------|
| 170 | <i>atp9</i>  | 134 | 45  | TCA (S) => TTA (L) | 1    |
| 171 | <i>atp9</i>  | 182 | 61  | TCG (S) => TTG (L) | 1    |
| 172 | <i>atp9</i>  | 191 | 64  | CCA (P) => CTA (L) | 1    |
| 173 | <i>atp9</i>  | 212 | 71  | TCA (S) => TTA (L) | 1    |
| 174 | <i>atp9</i>  | 215 | 72  | TCC (S) => TTC (F) | 1    |
| 175 | <i>atp9</i>  | 223 | 75  | CGA (R) => TGA (X) | 1    |
| 176 | <i>sdh3</i>  | 67  | 23  | CCC (P) => TCC (S) | 1    |
| 177 | <i>sdh3</i>  | 376 | 126 | CTC (L) => TTC (F) | 0.83 |
| 178 | <i>rpl16</i> | 79  | 27  | CAG (Q) => TAG (X) | 1    |
| 179 | <i>rpl16</i> | 227 | 76  | ACT (T) => ATT (I) | 1    |
| 180 | <i>rpl16</i> | 355 | 119 | CTC (L) => TTC (F) | 0.89 |
| 181 | <i>rpl16</i> | 524 | 175 | CCA (P) => CTA (L) | 1    |
| 182 | <i>rpl16</i> | 530 | 177 | TCG (S) => TTG (L) | 0.75 |
| 183 | <i>rps3</i>  | 314 | 105 | CCA (P) => CTA (L) | 0.86 |
| 184 | <i>rps3</i>  | 647 | 216 | CCG (P) => CTG (L) | 1    |
| 185 | <i>rps3</i>  | 674 | 225 | CCG (P) => CTG (L) | 0.86 |
| 186 | <i>rps3</i>  | 785 | 262 | TCA (S) => TTA (L) | 1    |
| 187 | <i>rps3</i>  | 838 | 280 | CGT (R) => TGT (C) | 1    |
| 188 | <i>rps3</i>  | 902 | 301 | TCA (S) => TTA (L) | 0.86 |
| 189 | <i>rps19</i> | 62  | 21  | TCG (S) => TTG (L) | 1    |
| 190 | <i>rps19</i> | 109 | 37  | CCT (P) => TTT (F) | 1    |
| 191 | <i>rps19</i> | 110 | 37  | CCT (P) => TTT (F) | 1    |
| 192 | <i>rpl2</i>  | 215 | 72  | CCA (P) => CTA (L) | 0.75 |
| 193 | <i>rpl2</i>  | 329 | 110 | CCA (P) => CTA (L) | 1    |
| 194 | <i>rpl2</i>  | 494 | 165 | GCG (A) => GTG (V) | 0.67 |
| 195 | <i>rpl2</i>  | 517 | 173 | CTC (L) => TTC (F) | 1    |
| 196 | <i>rpl2</i>  | 550 | 184 | CCC (P) => TCC (S) | 1    |
| 197 | <i>atp8</i>  | 47  | 16  | TCA (S) => TTA (L) | 1    |
| 198 | <i>atp8</i>  | 58  | 20  | CTC (L) => TTC (F) | 1    |

|     |             |     |     |                    |      |
|-----|-------------|-----|-----|--------------------|------|
| 199 | <i>atp8</i> | 452 | 151 | CCA (P) => CTA (L) | 0.75 |
| 200 | <i>cox3</i> | 289 | 97  | CTT (L) => TTT (F) | 0.92 |
| 201 | <i>cox3</i> | 304 | 102 | CGG (R) => TGG (W) | 1    |
| 202 | <i>cox3</i> | 311 | 104 | TCT (S) => TTT (F) | 0.92 |
| 203 | <i>cox3</i> | 314 | 105 | TCT (S) => TTT (F) | 0.92 |
| 204 | <i>cox3</i> | 419 | 140 | CCC (P) => CTC (L) | 1    |
| 205 | <i>cox3</i> | 422 | 141 | CCT (P) => CTT (L) | 0.92 |
| 206 | <i>cox3</i> | 512 | 171 | TCA (S) => TTA (L) | 0.75 |
| 207 | <i>cox3</i> | 653 | 218 | TCG (S) => TTG (L) | 1    |
| 208 | <i>cox3</i> | 754 | 252 | CGG (R) => TGG (W) | 0.92 |
| 209 | <i>cox3</i> | 764 | 255 | CCA (P) => CTA (L) | 0.92 |
| 210 | <i>sdh4</i> | 155 | 52  | CCA (P) => CTA (L) | 0.88 |
| 211 | <i>sdh4</i> | 203 | 68  | CCA (P) => CTA (L) | 0.75 |
| 212 | <i>sdh4</i> | 259 | 87  | CAT (H) => TAT (Y) | 0.88 |
| 213 | <i>cox1</i> | 155 | 52  | TCT (S) => TTT (F) | 1    |
| 214 | <i>cox1</i> | 167 | 56  | TCT (S) => TTT (F) | 1    |
| 215 | <i>cox1</i> | 265 | 89  | CCA (P) => TCA (S) | 1    |
| 216 | <i>cox1</i> | 356 | 119 | TCA (S) => TTA (L) | 1    |
| 217 | <i>cox1</i> | 365 | 122 | TCT (S) => TTT (F) | 1    |
| 218 | <i>cox1</i> | 428 | 143 | TCC (S) => TTC (F) | 1    |
| 219 | <i>cox1</i> | 464 | 155 | TCA (S) => TTA (L) | 1    |
| 220 | <i>cox1</i> | 503 | 168 | CCA (P) => CTA (L) | 1    |
| 221 | <i>cox1</i> | 581 | 194 | TCT (S) => TTT (F) | 1    |
| 222 | <i>cox1</i> | 628 | 210 | CGG (R) => TGG (W) | 1    |
| 223 | <i>cox1</i> | 659 | 220 | CCC (P) => CTC (L) | 1    |
| 224 | <i>cox1</i> | 674 | 225 | TCC (S) => TTC (F) | 1    |
| 225 | <i>cox1</i> | 758 | 253 | ACA (T) => ATA (I) | 1    |
| 226 | <i>cox1</i> | 773 | 258 | TCT (S) => TTT (F) | 1    |
| 227 | <i>cox1</i> | 950 | 317 | TCC (S) => TTC (F) | 1    |



|     |             |      |     |                    |      |
|-----|-------------|------|-----|--------------------|------|
| 228 | <i>cox1</i> | 1099 | 367 | CAC (H) => TAC (Y) | 1    |
| 229 | <i>cox1</i> | 1187 | 396 | CCG (P) => CTG (L) | 0.89 |
| 230 | <i>cox1</i> | 1318 | 440 | CGT (R) => TGT (C) | 0.78 |
| 231 | <i>cox1</i> | 1346 | 449 | TCA (S) => TTA (L) | 1    |
| 232 | <i>cox1</i> | 1402 | 468 | CCA (P) => TCA (S) | 1    |
| 233 | <i>cox1</i> | 1412 | 471 | TCG (S) => TTG (L) | 1    |
| 234 | <i>nad7</i> | 38   | 13  | TCG (S) => TTG (L) | 0.75 |
| 235 | <i>nad7</i> | 77   | 26  | TCA (S) => TTA (L) | 1    |
| 236 | <i>nad7</i> | 83   | 28  | TCA (S) => TTA (L) | 1    |
| 237 | <i>nad7</i> | 137  | 46  | TCA (S) => TTA (L) | 1    |
| 238 | <i>nad7</i> | 205  | 69  | CAT (H) => TAT (Y) | 1    |
| 239 | <i>nad7</i> | 212  | 71  | TCA (S) => TTA (L) | 1    |
| 240 | <i>nad7</i> | 277  | 93  | CGT (R) => TGT (C) | 1    |
| 241 | <i>nad7</i> | 296  | 99  | TCA (S) => TTA (L) | 0.88 |
| 242 | <i>nad7</i> | 305  | 102 | TCA (S) => TTA (L) | 1    |
| 243 | <i>nad7</i> | 344  | 115 | TCA (S) => TTA (L) | 1    |
| 244 | <i>nad7</i> | 494  | 165 | TCC (S) => TTC (F) | 1    |
| 245 | <i>nad7</i> | 539  | 180 | TCA (S) => TTA (L) | 0.88 |
| 246 | <i>nad7</i> | 812  | 271 | TCA (S) => TTA (L) | 0.88 |
| 247 | <i>nad7</i> | 859  | 287 | CCT (P) => TCT (S) | 0.88 |
| 248 | <i>nad7</i> | 943  | 315 | CGT (R) => TGT (C) | 1    |
| 249 | <i>nad7</i> | 965  | 322 | TCT (S) => TTT (F) | 1    |
| 250 | <i>nad7</i> | 989  | 330 | TCT (S) => TTT (F) | 1    |
| 251 | <i>nad7</i> | 1010 | 337 | CCA (P) => CTA (L) | 1    |
| 252 | <i>nad7</i> | 1052 | 351 | TCT (S) => TTT (F) | 1    |
| 253 | <i>nad9</i> | 428  | 143 | TCC (S) => TTC (F) | 0.73 |
| 254 | <i>nad9</i> | 506  | 169 | TCT (S) => TTT (F) | 0.75 |
| 255 | <i>nad9</i> | 527  | 176 | CCA (P) => CTA (L) | 0.92 |
| 256 | <i>nad9</i> | 581  | 194 | TCG (S) => TTG (L) | 0.92 |

|     |              |     |     |                    |      |
|-----|--------------|-----|-----|--------------------|------|
| 257 | <i>nad9</i>  | 604 | 202 | CAT (H) => TAT (Y) | 1    |
| 258 | <i>nad9</i>  | 712 | 238 | CCG (P) => TCG (S) | 0.83 |
| 259 | <i>nad9</i>  | 742 | 248 | CGG (R) => TGG (W) | 1    |
| 260 | <i>nad9</i>  | 782 | 261 | TCC (S) => TTC (F) | 1    |
| 261 | <i>nad9</i>  | 812 | 271 | TCA (S) => TTA (L) | 1    |
| 262 | <i>nad9</i>  | 853 | 285 | CTT (L) => TTT (F) | 1    |
| 263 | <i>nad9</i>  | 953 | 318 | TCT (S) => TTT (F) | 1    |
| 264 | <i>nad4L</i> | 11  | 4   | TCT (S) => TTT (F) | 1    |
| 265 | <i>nad4L</i> | 17  | 6   | TCA (S) => TTA (L) | 1    |
| 266 | <i>nad4L</i> | 25  | 9   | CGG (R) => TGG (W) | 1    |
| 267 | <i>nad4L</i> | 56  | 19  | CCT (P) => CTT (L) | 1    |
| 268 | <i>nad4L</i> | 65  | 22  | TCA (S) => TTA (L) | 1    |
| 269 | <i>nad4L</i> | 70  | 24  | CCA (P) => TCA (S) | 1    |
| 270 | <i>nad4L</i> | 80  | 27  | TCA (S) => TTA (L) | 1    |
| 271 | <i>nad4L</i> | 101 | 34  | TCG (S) => TTG (L) | 0.88 |
| 272 | <i>nad4L</i> | 128 | 43  | TCG (S) => TTG (L) | 1    |
| 273 | <i>nad4L</i> | 149 | 50  | TCA (S) => TTA (L) | 0.75 |
| 274 | <i>nad4L</i> | 158 | 53  | TCA (S) => TTA (L) | 0.88 |
| 275 | <i>nad4L</i> | 167 | 56  | CCA (P) => CTA (L) | 0.88 |
| 276 | <i>nad4L</i> | 200 | 67  | TCA (S) => TTA (L) | 1    |
| 277 | <i>nad4L</i> | 251 | 84  | TCT (S) => TTT (F) | 0.88 |
| 278 | <i>atp4</i>  | 71  | 24  | TCA (S) => TTA (L) | 1    |
| 279 | <i>atp4</i>  | 89  | 30  | TCA (S) => TTA (L) | 1    |
| 280 | <i>atp4</i>  | 118 | 40  | CGT (R) => TGT (C) | 0.71 |
| 281 | <i>atp4</i>  | 215 | 72  | TCG (S) => TTG (L) | 1    |
| 282 | <i>atp4</i>  | 248 | 83  | CCT (P) => CTT (L) | 1    |
| 283 | <i>atp4</i>  | 395 | 132 | TCA (S) => TTA (L) | 1    |
| 284 | <i>atp4</i>  | 407 | 136 | CCA (P) => CTA (L) | 0.71 |
| 285 | <i>atp4</i>  | 416 | 139 | ACT (T) => ATT (I) | 0.86 |

|     |             |     |     |                    |      |
|-----|-------------|-----|-----|--------------------|------|
| 286 | <i>ccmC</i> | 76  | 26  | CGG (R) => TGG (W) | 0.78 |
| 287 | <i>ccmC</i> | 103 | 35  | CAT (H) => TAT (Y) | 1    |
| 288 | <i>ccmC</i> | 115 | 39  | CGG (R) => TGG (W) | 0.78 |
| 289 | <i>ccmC</i> | 133 | 45  | CTT (L) => TTT (F) | 0.67 |
| 290 | <i>ccmC</i> | 161 | 54  | CCG (P) => CTG (L) | 0.78 |
| 291 | <i>ccmC</i> | 179 | 60  | GCG (A) => GTG (V) | 0.78 |
| 292 | <i>ccmC</i> | 184 | 62  | CGG (R) => TGG (W) | 1    |
| 293 | <i>ccmC</i> | 299 | 100 | TCT (S) => TTT (F) | 1    |
| 294 | <i>ccmC</i> | 331 | 111 | CGG (R) => TGG (W) | 1    |
| 295 | <i>ccmC</i> | 395 | 132 | TCG (S) => TTG (L) | 1    |
| 296 | <i>ccmC</i> | 400 | 134 | CTT (L) => TTT (F) | 0.89 |
| 297 | <i>ccmC</i> | 421 | 141 | CGT (R) => TGT (C) | 0.78 |
| 298 | <i>ccmC</i> | 436 | 146 | CCT (P) => TCT (S) | 0.89 |
| 299 | <i>ccmC</i> | 446 | 149 | CCG (P) => CTG (L) | 0.78 |
| 300 | <i>ccmC</i> | 451 | 151 | CCT (P) => TCT (S) | 1    |
| 301 | <i>ccmC</i> | 458 | 153 | TCA (S) => TTA (L) | 0.78 |
| 302 | <i>ccmC</i> | 463 | 155 | CGT (R) => TGT (C) | 1    |
| 303 | <i>ccmC</i> | 467 | 156 | GCT (A) => GTT (V) | 0.78 |
| 304 | <i>ccmC</i> | 473 | 158 | CCG (P) => CTG (L) | 1    |
| 305 | <i>ccmC</i> | 497 | 166 | TCT (S) => TTT (F) | 1    |
| 306 | <i>ccmC</i> | 521 | 174 | TCG (S) => TTG (L) | 1    |
| 307 | <i>ccmC</i> | 548 | 183 | TCT (S) => TTT (F) | 1    |
| 308 | <i>ccmC</i> | 568 | 190 | CCT (P) => TCT (S) | 1    |
| 309 | <i>ccmC</i> | 575 | 192 | CCC (P) => CTC (L) | 1    |
| 310 | <i>ccmC</i> | 605 | 202 | TCC (S) => TTC (F) | 1    |
| 311 | <i>ccmC</i> | 608 | 203 | CCC (P) => CTC (L) | 0.89 |
| 312 | <i>ccmC</i> | 614 | 205 | TCA (S) => TTA (L) | 0.78 |
| 313 | <i>ccmC</i> | 619 | 207 | CGT (R) => TGT (C) | 0.78 |
| 314 | <i>ccmC</i> | 650 | 217 | CCT (P) => CTT (L) | 0.78 |

|     |              |     |     |                    |      |
|-----|--------------|-----|-----|--------------------|------|
| 315 | <i>ccmC</i>  | 656 | 219 | CCA (P) => CTA (L) | 0.89 |
| 316 | <i>ccmC</i>  | 673 | 225 | CCT (P) => TCT (S) | 0.78 |
| 317 | <i>cox2</i>  | 71  | 24  | TCT (S) => TTT (F) | 1    |
| 318 | <i>cox2</i>  | 161 | 54  | TCA (S) => TTA (L) | 0.95 |
| 319 | <i>cox2</i>  | 163 | 55  | CGG (R) => TGG (W) | 1    |
| 320 | <i>cox2</i>  | 253 | 85  | CGG (R) => TGG (W) | 1    |
| 321 | <i>cox2</i>  | 278 | 93  | CCG (P) => CTG (L) | 1    |
| 322 | <i>cox2</i>  | 379 | 127 | CGG (R) => TGG (W) | 1    |
| 323 | <i>cox2</i>  | 443 | 148 | ACG (T) => ATG (M) | 1    |
| 324 | <i>cox2</i>  | 461 | 154 | CCA (P) => CTA (L) | 1    |
| 325 | <i>cox2</i>  | 476 | 159 | TCA (S) => TTA (L) | 1    |
| 326 | <i>cox2</i>  | 544 | 182 | CCT (P) => TCT (S) | 1    |
| 327 | <i>cox2</i>  | 557 | 186 | CCT (P) => CTT (L) | 1    |
| 328 | <i>cox2</i>  | 581 | 194 | TCA (S) => TTA (L) | 1    |
| 329 | <i>cox2</i>  | 632 | 211 | TCG (S) => TTG (L) | 0.84 |
| 330 | <i>cox2</i>  | 698 | 233 | ACG (T) => ATG (M) | 1    |
| 331 | <i>cox2</i>  | 742 | 248 | CGG (R) => TGG (W) | 1    |
| 332 | <i>rps13</i> | 5   | 2   | TCA (S) => TTA (L) | 0.6  |
| 333 | <i>rps13</i> | 26  | 9   | TCA (S) => TTA (L) | 0.9  |
| 334 | <i>rps13</i> | 56  | 19  | TCA (S) => TTA (L) | 0.9  |
| 335 | <i>rps13</i> | 100 | 34  | CGT (R) => TGT (C) | 0.9  |
| 336 | <i>rps13</i> | 287 | 96  | TCG (S) => TTG (L) | 1    |
| 337 | <i>rps4</i>  | 133 | 45  | CCG (P) => TCG (S) | 0.67 |
| 338 | <i>rps4</i>  | 164 | 55  | TCA (S) => TTA (L) | 1    |
| 339 | <i>rps4</i>  | 184 | 62  | CCC (P) => TCC (S) | 0.83 |
| 340 | <i>rps4</i>  | 193 | 65  | CAT (H) => TAT (Y) | 1    |
| 341 | <i>rps4</i>  | 257 | 86  | CCA (P) => CTA (L) | 1    |
| 342 | <i>rps4</i>  | 266 | 89  | CCA (P) => CTA (L) | 0.83 |
| 343 | <i>rps4</i>  | 278 | 93  | TCG (S) => TTG (L) | 0.67 |

|     |             |      |     |                    |      |
|-----|-------------|------|-----|--------------------|------|
| 344 | <i>rps4</i> | 290  | 97  | CCG (P) => CTG (L) | 0.83 |
| 345 | <i>rps4</i> | 335  | 112 | CCG (P) => CTG (L) | 1    |
| 346 | <i>rps4</i> | 482  | 161 | TCA (S) => TTA (L) | 1    |
| 347 | <i>rps4</i> | 914  | 305 | TCG (S) => TTG (L) | 0.83 |
| 348 | <i>rps4</i> | 925  | 309 | CAT (H) => TAT (Y) | 0.83 |
| 349 | <i>rps4</i> | 935  | 312 | CCA (P) => CTA (L) | 0.67 |
| 350 | <i>rps4</i> | 950  | 317 | TCT (S) => TTT (F) | 1    |
| 351 | <i>rps4</i> | 1001 | 334 | CCA (P) => CTA (L) | 0.83 |
| 352 | <i>rps4</i> | 1010 | 337 | CCT (P) => CTT (L) | 1    |
| 353 | <i>rps4</i> | 1015 | 339 | CGG (R) => TGG (W) | 1    |
| 354 | <i>nad1</i> | 8    | 3   | CCT (P) => CTT (L) | 0.9  |
| 355 | <i>nad1</i> | 65   | 22  | TCC (S) => TTC (F) | 1    |
| 356 | <i>nad1</i> | 100  | 34  | CCT (P) => TCT (S) | 0.9  |
| 357 | <i>nad1</i> | 149  | 50  | GCG (A) => GTG (V) | 0.9  |
| 358 | <i>nad1</i> | 209  | 70  | TCC (S) => TTC (F) | 1    |
| 359 | <i>nad1</i> | 308  | 103 | TCA (S) => TTA (L) | 1    |
| 360 | <i>nad1</i> | 434  | 145 | ACT (T) => ATT (I) | 1    |
| 361 | <i>nad6</i> | 7    | 3   | CTT (L) => TTT (F) | 1    |
| 362 | <i>nad6</i> | 83   | 28  | TCG (S) => TTG (L) | 1    |
| 363 | <i>nad6</i> | 88   | 30  | CCC (P) => TTC (F) | 0.7  |
| 364 | <i>nad6</i> | 89   | 30  | CCC (P) => TTC (F) | 0.7  |
| 365 | <i>nad6</i> | 95   | 32  | CCA (P) => CTA (L) | 1    |
| 366 | <i>nad6</i> | 103  | 35  | CGC (R) => TGC (C) | 1    |
| 367 | <i>nad6</i> | 161  | 54  | CCA (P) => CTA (L) | 1    |
| 368 | <i>nad6</i> | 169  | 57  | CAT (H) => TAT (Y) | 1    |
| 369 | <i>nad6</i> | 191  | 64  | TCA (S) => TTA (L) | 1    |
| 370 | <i>nad6</i> | 446  | 149 | TCC (S) => TTC (F) | 1    |
| 371 | <i>nad6</i> | 463  | 155 | CCT (P) => TCT (S) | 0.8  |
| 372 | <i>nad6</i> | 569  | 190 | TCT (S) => TTT (F) | 1    |

|     |              |     |     |                    |      |
|-----|--------------|-----|-----|--------------------|------|
| 373 | <i>nad2</i>  | 26  | 9   | TCC (S) => TTC (F) | 0.89 |
| 374 | <i>nad2</i>  | 203 | 68  | TCT (S) => TTT (F) | 0.67 |
| 375 | <i>nad2</i>  | 206 | 69  | TCC (S) => TTC (F) | 1    |
| 376 | <i>nad2</i>  | 230 | 77  | TCT (S) => TTT (F) | 1    |
| 377 | <i>nad2</i>  | 236 | 79  | TCC (S) => TTC (F) | 0.67 |
| 378 | <i>nad2</i>  | 251 | 84  | CCA (P) => CTA (L) | 1    |
| 379 | <i>nad2</i>  | 262 | 88  | CGC (R) => TGC (C) | 1    |
| 380 | <i>nad2</i>  | 289 | 97  | CAT (H) => TAT (Y) | 1    |
| 381 | <i>nad2</i>  | 296 | 99  | TCA (S) => TTA (L) | 1    |
| 382 | <i>nad2</i>  | 323 | 108 | CCT (P) => CTT (L) | 1    |
| 383 | <i>nad2</i>  | 392 | 131 | TCG (S) => TTG (L) | 1    |
| 384 | <i>rps12</i> | 71  | 24  | TCG (S) => TTG (L) | 0.94 |
| 385 | <i>rps12</i> | 100 | 34  | CGC (R) => TGC (C) | 1    |
| 386 | <i>rps12</i> | 104 | 35  | CCG (P) => CTG (L) | 1    |
| 387 | <i>rps12</i> | 196 | 66  | CAC (H) => TAC (Y) | 0.94 |
| 388 | <i>rps12</i> | 221 | 74  | TCG (S) => TTG (L) | 0.88 |
| 389 | <i>rps12</i> | 269 | 90  | TCG (S) => TTG (L) | 0.94 |
| 390 | <i>rps12</i> | 284 | 95  | TCC (S) => TTC (F) | 0.76 |
| 391 | <i>nad3</i>  | 5   | 2   | TCA (S) => TTA (L) | 0.79 |
| 392 | <i>nad3</i>  | 44  | 15  | CCG (P) => CTG (L) | 1    |
| 393 | <i>nad3</i>  | 62  | 21  | CCA (P) => CTA (L) | 0.95 |
| 394 | <i>nad3</i>  | 80  | 27  | CCA (P) => CTA (L) | 1    |
| 395 | <i>nad3</i>  | 146 | 49  | TCC (S) => TTC (F) | 1    |
| 396 | <i>nad3</i>  | 208 | 70  | CCT (P) => TTT (F) | 0.95 |
| 397 | <i>nad3</i>  | 209 | 70  | CCT (P) => TTT (F) | 0.95 |
| 398 | <i>nad3</i>  | 215 | 72  | CCG (P) => CTG (L) | 1    |
| 399 | <i>nad3</i>  | 230 | 77  | TCC (S) => TTC (F) | 0.86 |
| 400 | <i>nad3</i>  | 247 | 83  | CCT (P) => TCT (S) | 1    |
| 401 | <i>nad3</i>  | 251 | 84  | CCC (P) => CTC (L) | 0.91 |

|     |             |     |     |                    |      |
|-----|-------------|-----|-----|--------------------|------|
| 402 | <i>nad3</i> | 266 | 89  | CCG (P) => CTG (L) | 1    |
| 403 | <i>nad3</i> | 275 | 92  | TCT (S) => TTT (F) | 1    |
| 404 | <i>nad3</i> | 317 | 106 | TCT (S) => TTT (F) | 0.95 |
| 405 | <i>nad3</i> | 344 | 115 | TCG (S) => TTG (L) | 1    |
| 406 | <i>nad3</i> | 349 | 117 | CGG (R) => TGG (W) | 1    |
| 407 | <i>rps1</i> | 23  | 8   | CCT (P) => CTT (L) | 0.67 |
| 408 | <i>rps1</i> | 56  | 19  | CCT (P) => CTT (L) | 0.67 |
| 409 | <i>rps1</i> | 380 | 127 | TCA (S) => TTA (L) | 0.67 |

481

482 \*The cutoff score (C-value) was set to 0.6.

483

484 **Table 8. Predicted RNA-editing sites in Scaffold 2 of the *C. sinensis* var.**

485 *assamica* mt genome\*.

486

| No. | Gene         | Nucleotide Position | AA Pos | Effect             | Score |
|-----|--------------|---------------------|--------|--------------------|-------|
| 1   | <i>rps19</i> | 116                 | 39     | TCG (S) => TTG (L) | 1     |
| 2   | <i>rps19</i> | 163                 | 55     | CCT (P) => TTT (F) | 1     |
| 3   | <i>rps19</i> | 164                 | 55     | CCT (P) => TTT (F) | 1     |
| 4   | <i>atp9</i>  | 53                  | 18     | TCA (S) => TTA (L) | 1     |
| 5   | <i>atp9</i>  | 83                  | 28     | TCA (S) => TTA (L) | 1     |
| 6   | <i>cob</i>   | 118                 | 40     | CCG (P) => TCG (S) | 0.92  |
| 7   | <i>cob</i>   | 178                 | 60     | CAC (H) => TAC (Y) | 1     |
| 8   | <i>cob</i>   | 286                 | 96     | CTC (L) => TTC (F) | 1     |
| 9   | <i>cob</i>   | 298                 | 100    | CAC (H) => TAC (Y) | 1     |
| 10  | <i>cob</i>   | 325                 | 109    | CAT (H) => TAT (Y) | 1     |
| 11  | <i>cob</i>   | 358                 | 120    | CGG (R) => TGG (W) | 1     |
| 12  | <i>cob</i>   | 419                 | 140    | CCA (P) => CTA (L) | 1     |
| 13  | <i>cob</i>   | 568                 | 190    | CAT (H) => TAT (Y) | 0.92  |
| 14  | <i>cob</i>   | 680                 | 227    | TCT (S) => TTT (F) | 1     |
| 15  | <i>cob</i>   | 808                 | 270    | CCC (P) => TCC (S) | 1     |
| 16  | <i>cob</i>   | 853                 | 285    | CAT (H) => TAT (Y) | 1     |
| 17  | <i>cob</i>   | 908                 | 303    | CCA (P) => CTA (L) | 1     |
| 18  | <i>cob</i>   | 914                 | 305    | TCT (S) => TTT (F) | 1     |
| 19  | <i>cob</i>   | 982                 | 328    | CAC (H) => TAC (Y) | 0.85  |
| 20  | <i>cob</i>   | 1015                | 339    | CGC (R) => TGC (C) | 1     |
| 21  | <i>cob</i>   | 1084                | 362    | CCT (P) => TCT (S) | 1     |
| 22  | <i>cob</i>   | 1124                | 375    | CCG (P) => CTG (L) | 1     |
| 23  | <i>rps14</i> | 47                  | 16     | GCG (A) => GTG (V) | 0.6   |
| 24  | <i>rps14</i> | 271                 | 91     | CCT (P) => TCT (S) | 0.6   |



|    |              |     |     |                    |      |
|----|--------------|-----|-----|--------------------|------|
| 25 | <i>rpl5</i>  | 35  | 12  | TCA (S) => TTA (L) | 0.78 |
| 26 | <i>rpl5</i>  | 47  | 16  | CCG (P) => CTG (L) | 1    |
| 27 | <i>rpl5</i>  | 59  | 20  | CCG (P) => CTG (L) | 0.89 |
| 28 | <i>rpl5</i>  | 64  | 22  | CAC (H) => TAC (Y) | 1    |
| 29 | <i>rpl5</i>  | 92  | 31  | TCG (S) => TTG (L) | 1    |
| 30 | <i>rpl5</i>  | 172 | 58  | CGC (R) => TGC (C) | 0.89 |
| 31 | <i>rpl5</i>  | 518 | 173 | CCA (P) => CTA (L) | 0.89 |
| 32 | <i>rpl5</i>  | 521 | 174 | CCG (P) => CTG (L) | 1    |
| 33 | <i>nad2</i>  | 110 | 37  | TCT (S) => TTT (F) | 1    |
| 34 | <i>nad2</i>  | 125 | 42  | TCC (S) => TTC (F) | 1    |
| 35 | <i>nad2</i>  | 272 | 91  | TCT (S) => TTT (F) | 0.67 |
| 36 | <i>nad2</i>  | 284 | 95  | TCA (S) => TTA (L) | 1    |
| 37 | <i>nad2</i>  | 293 | 98  | TCT (S) => TTT (F) | 1    |
| 38 | <i>nad2</i>  | 412 | 138 | CAT (H) => TAT (Y) | 1    |
| 39 | <i>nad2</i>  | 442 | 148 | CGT (R) => TGT (C) | 0.78 |
| 40 | <i>nad2</i>  | 446 | 149 | ACT (T) => ATT (I) | 1    |
| 41 | <i>nad2</i>  | 512 | 171 | TCA (S) => TTA (L) | 0.78 |
| 42 | <i>nad2</i>  | 542 | 181 | TCA (S) => TTA (L) | 1    |
| 43 | <i>nad2</i>  | 611 | 204 | TCG (S) => TTG (L) | 1    |
| 44 | <i>nad2</i>  | 731 | 244 | CCA (P) => CTA (L) | 0.67 |
| 45 | <i>nad2</i>  | 760 | 254 | CGT (R) => TGT (C) | 1    |
| 46 | <i>nad2</i>  | 932 | 311 | TCA (S) => TTA (L) | 0.67 |
| 47 | <i>nad2</i>  | 941 | 314 | CCA (P) => CTA (L) | 1    |
| 48 | <i>nad2</i>  | 989 | 330 | TCA (S) => TTA (L) | 1    |
| 49 | <i>sdh3</i>  | 67  | 23  | CCA (P) => TCA (S) | 1    |
| 50 | <i>sdh3</i>  | 74  | 25  | TCC (S) => TTC (F) | 1    |
| 51 | <i>ccmFc</i> | 38  | 13  | TCC (S) => TTC (F) | 0.83 |
| 52 | <i>ccmFc</i> | 50  | 17  | CCT (P) => CTT (L) | 1    |
| 53 | <i>ccmFc</i> | 52  | 18  | CGT (R) => TGT (C) | 1    |

|    |              |      |     |                    |      |
|----|--------------|------|-----|--------------------|------|
| 54 | <i>ccmFc</i> | 103  | 35  | CCC (P) => TCC (S) | 1    |
| 55 | <i>ccmFc</i> | 119  | 40  | TCT (S) => TTT (F) | 1    |
| 56 | <i>ccmFc</i> | 122  | 41  | TCC (S) => TTC (F) | 1    |
| 57 | <i>ccmFc</i> | 146  | 49  | CCT (P) => CTT (L) | 1    |
| 58 | <i>ccmFc</i> | 151  | 51  | CCT (P) => TCT (S) | 0.83 |
| 59 | <i>ccmFc</i> | 155  | 52  | TCA (S) => TTA (L) | 1    |
| 60 | <i>ccmFc</i> | 160  | 54  | CCT (P) => TCT (S) | 0.67 |
| 61 | <i>ccmFc</i> | 203  | 68  | ACG (T) => ATG (M) | 1    |
| 62 | <i>ccmFc</i> | 305  | 102 | TCA (S) => TTA (L) | 0.83 |
| 63 | <i>ccmFc</i> | 391  | 131 | CGT (R) => TGT (C) | 1    |
| 64 | <i>ccmFc</i> | 406  | 136 | CGT (R) => TGT (C) | 0.83 |
| 65 | <i>ccmFc</i> | 620  | 207 | GCG (A) => GTG (V) | 1    |
| 66 | <i>ccmFc</i> | 704  | 235 | GCT (A) => GTT (V) | 0.83 |
| 67 | <i>ccmFc</i> | 1100 | 367 | CCA (P) => CTA (L) | 1    |
| 68 | <i>ccmFc</i> | 1121 | 374 | TCG (S) => TTG (L) | 1    |
| 69 | <i>ccmFc</i> | 1276 | 426 | CGA (R) => TGA (X) | 1    |

487

488 \*The cutoff score (C-value) was set to 0.6.



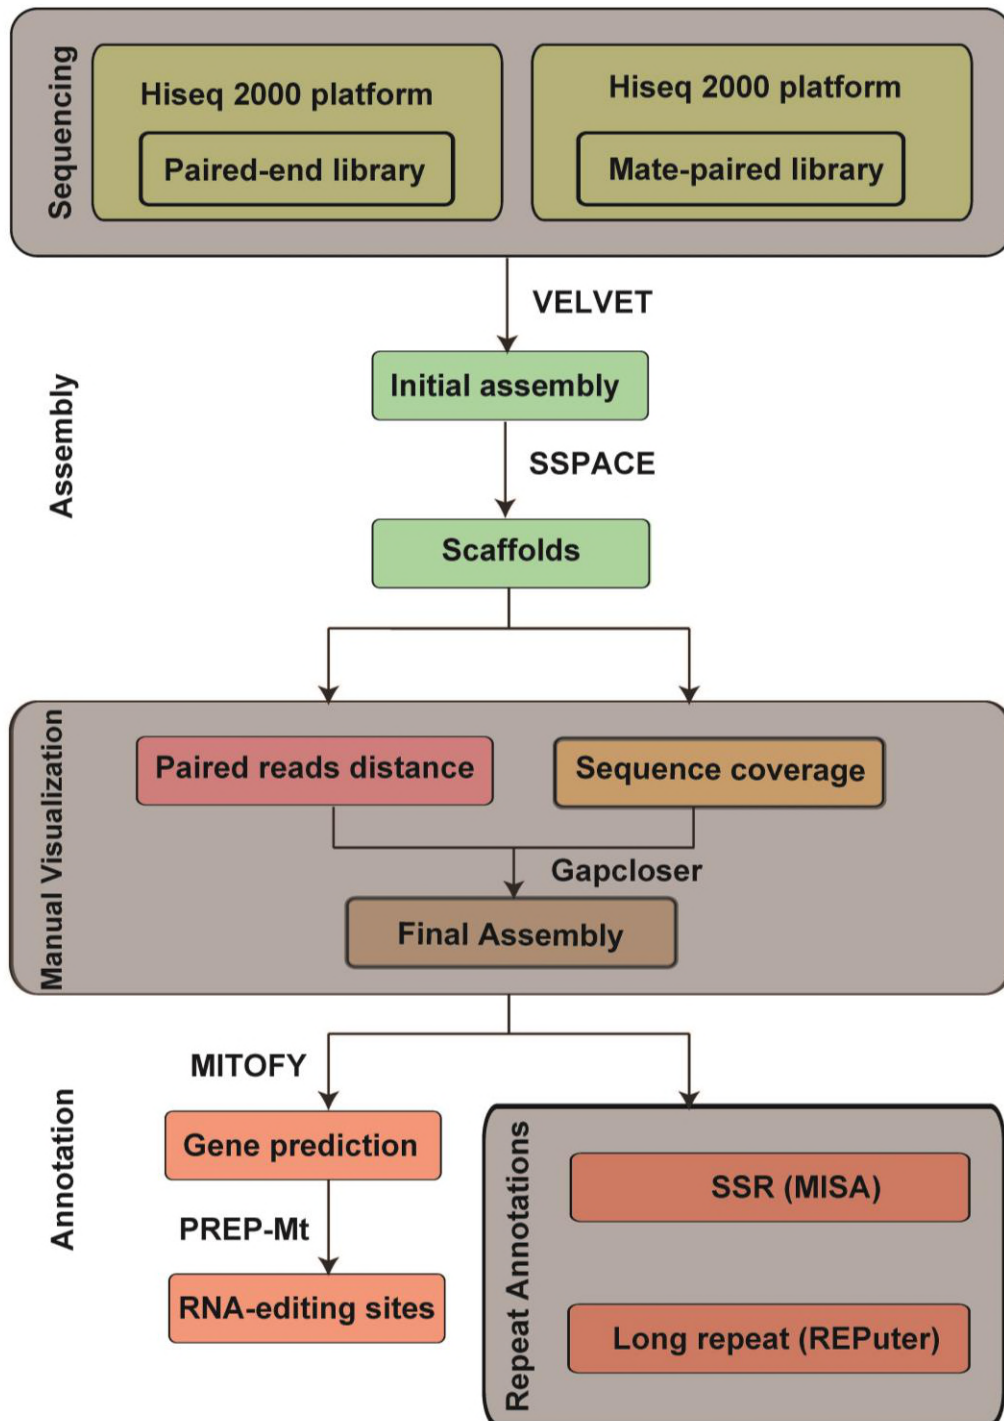

Figure 1. Workflow schema of the *Camellia sinensis* mitochondrial genome.





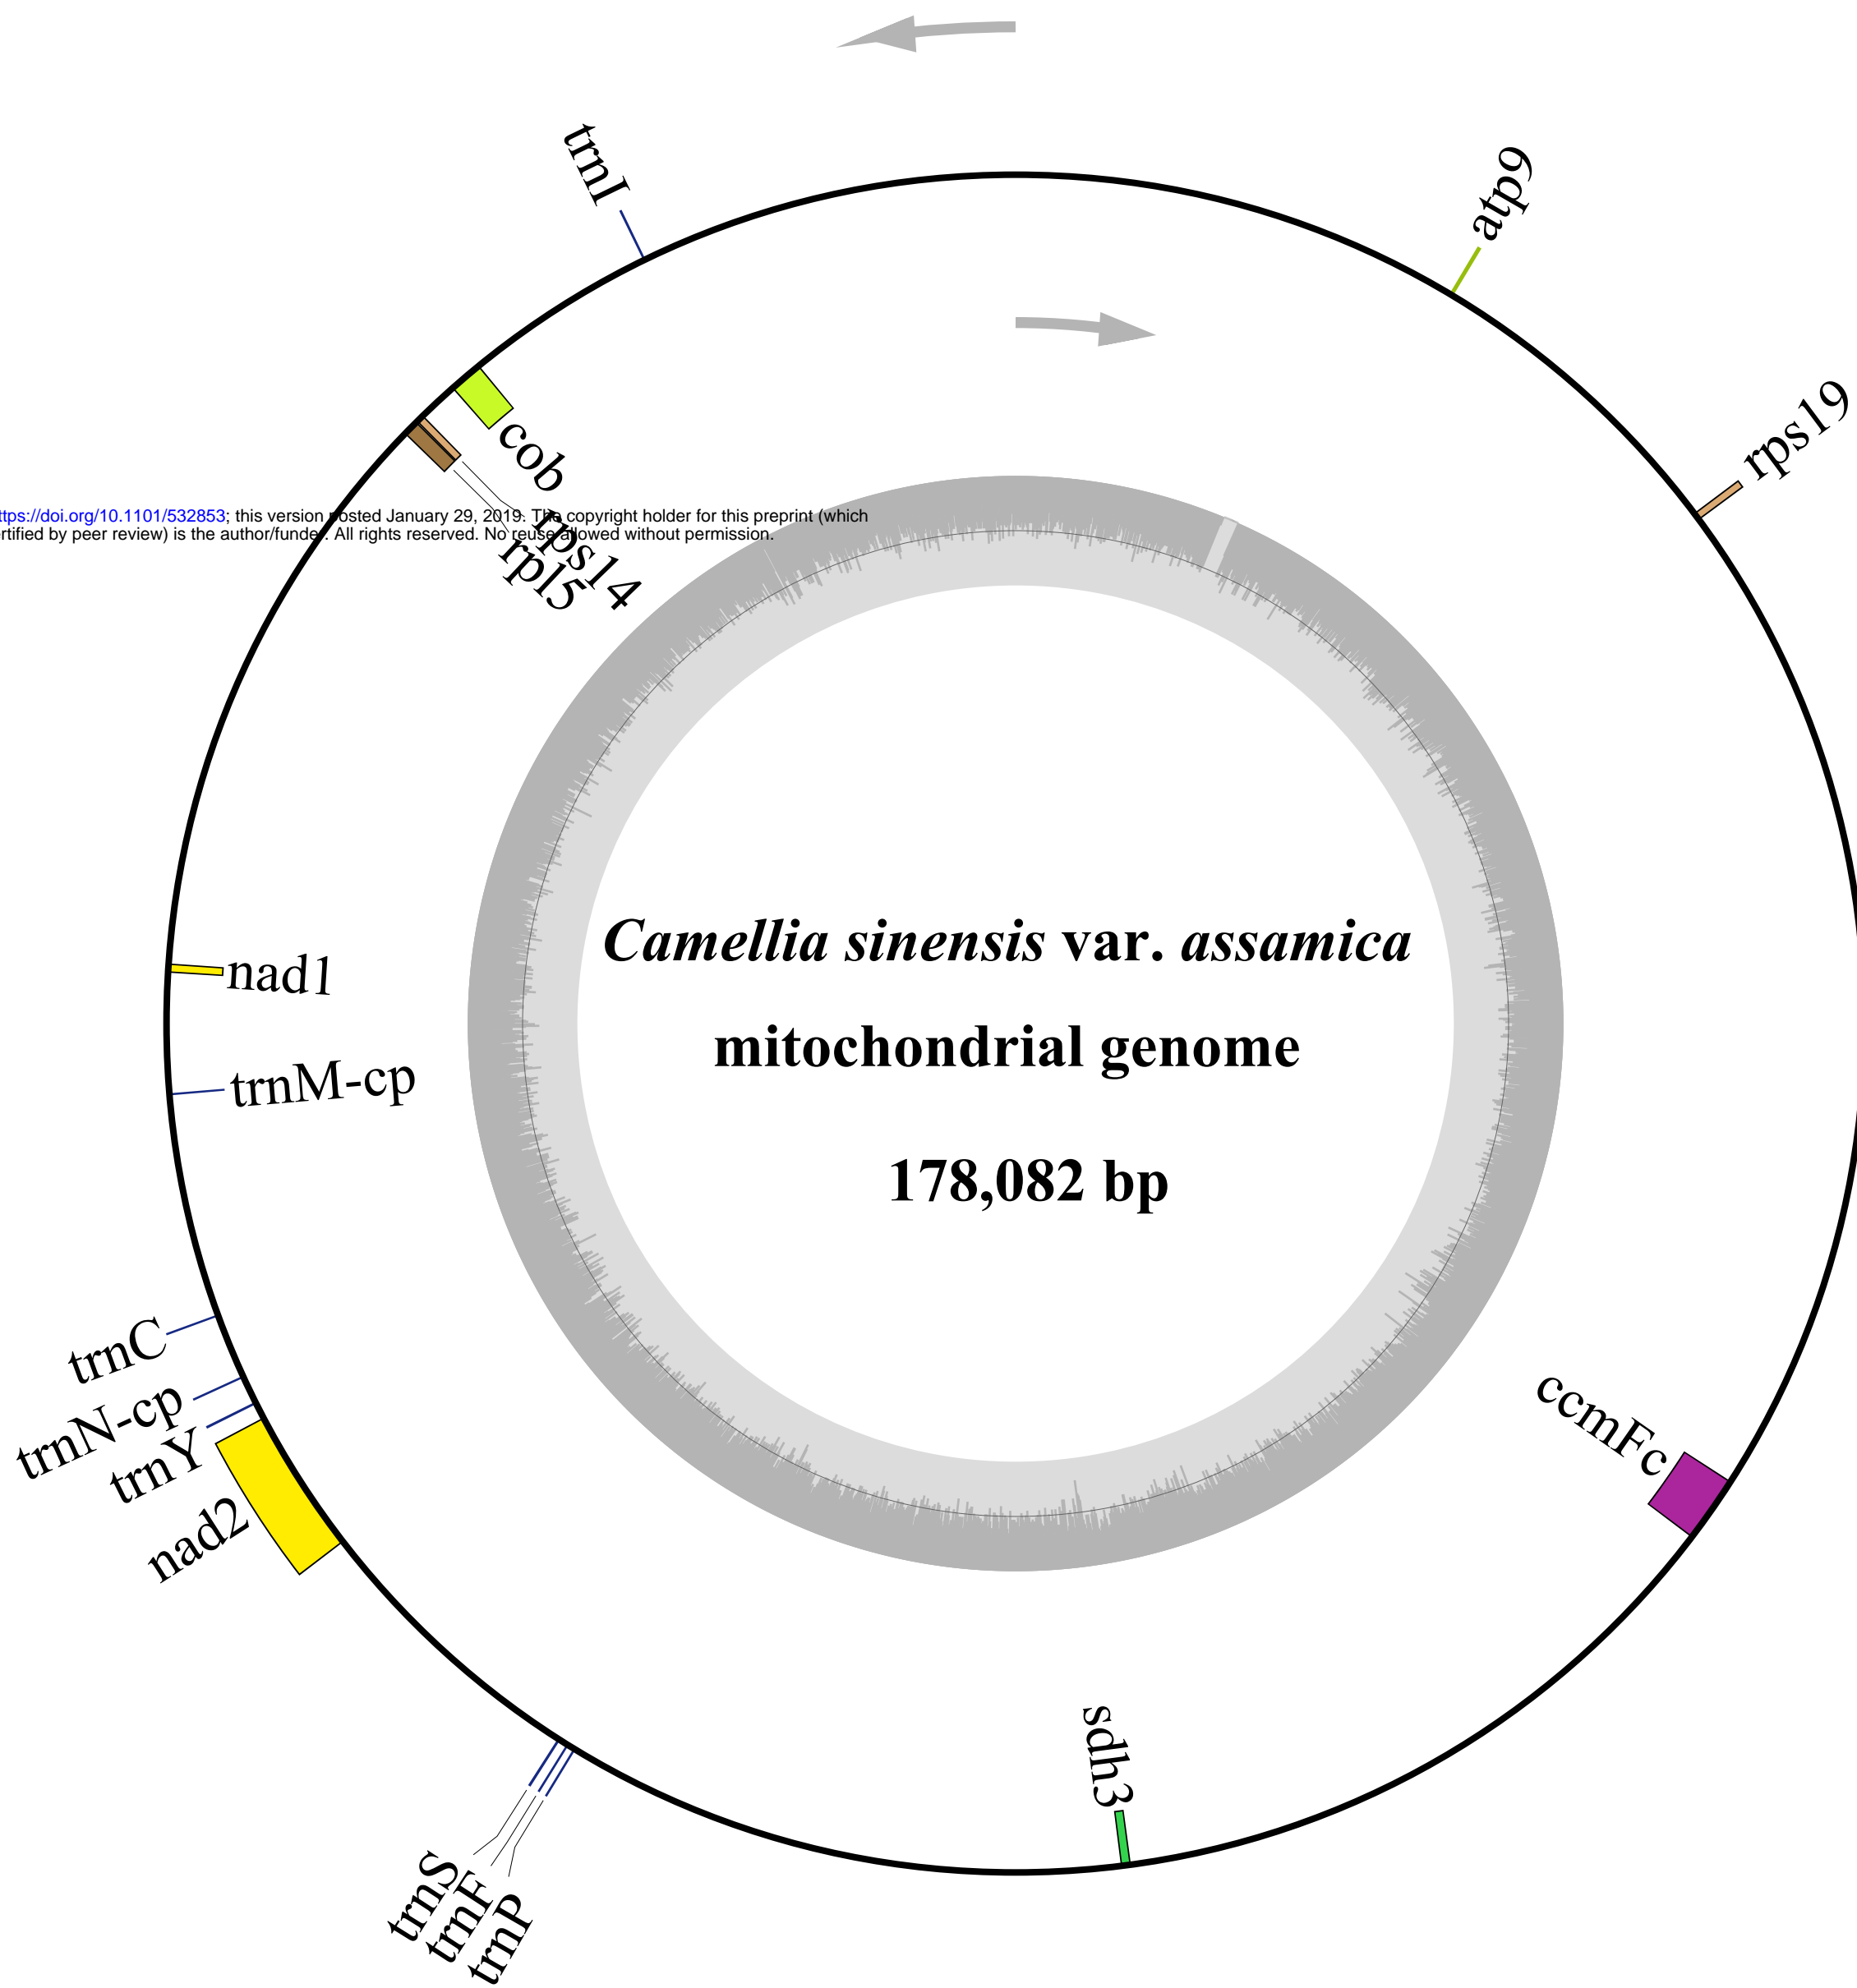

- complex I (NADH dehydrogenase)
- complex II (succinate dehydrogenase)
- complex III (ubichinol cytochrome c reductase)
- ATP synthase
- ribosomal proteins (SSU)
- ribosomal proteins (LSU)
- other genes
- transfer RNAs

bioRxiv preprint doi: <https://doi.org/10.1101/532853>; this version posted January 20, 2019. The copyright holder for this preprint (which was not certified by peer review) is the author/funder. All rights reserved. No reuse allowed without permission.

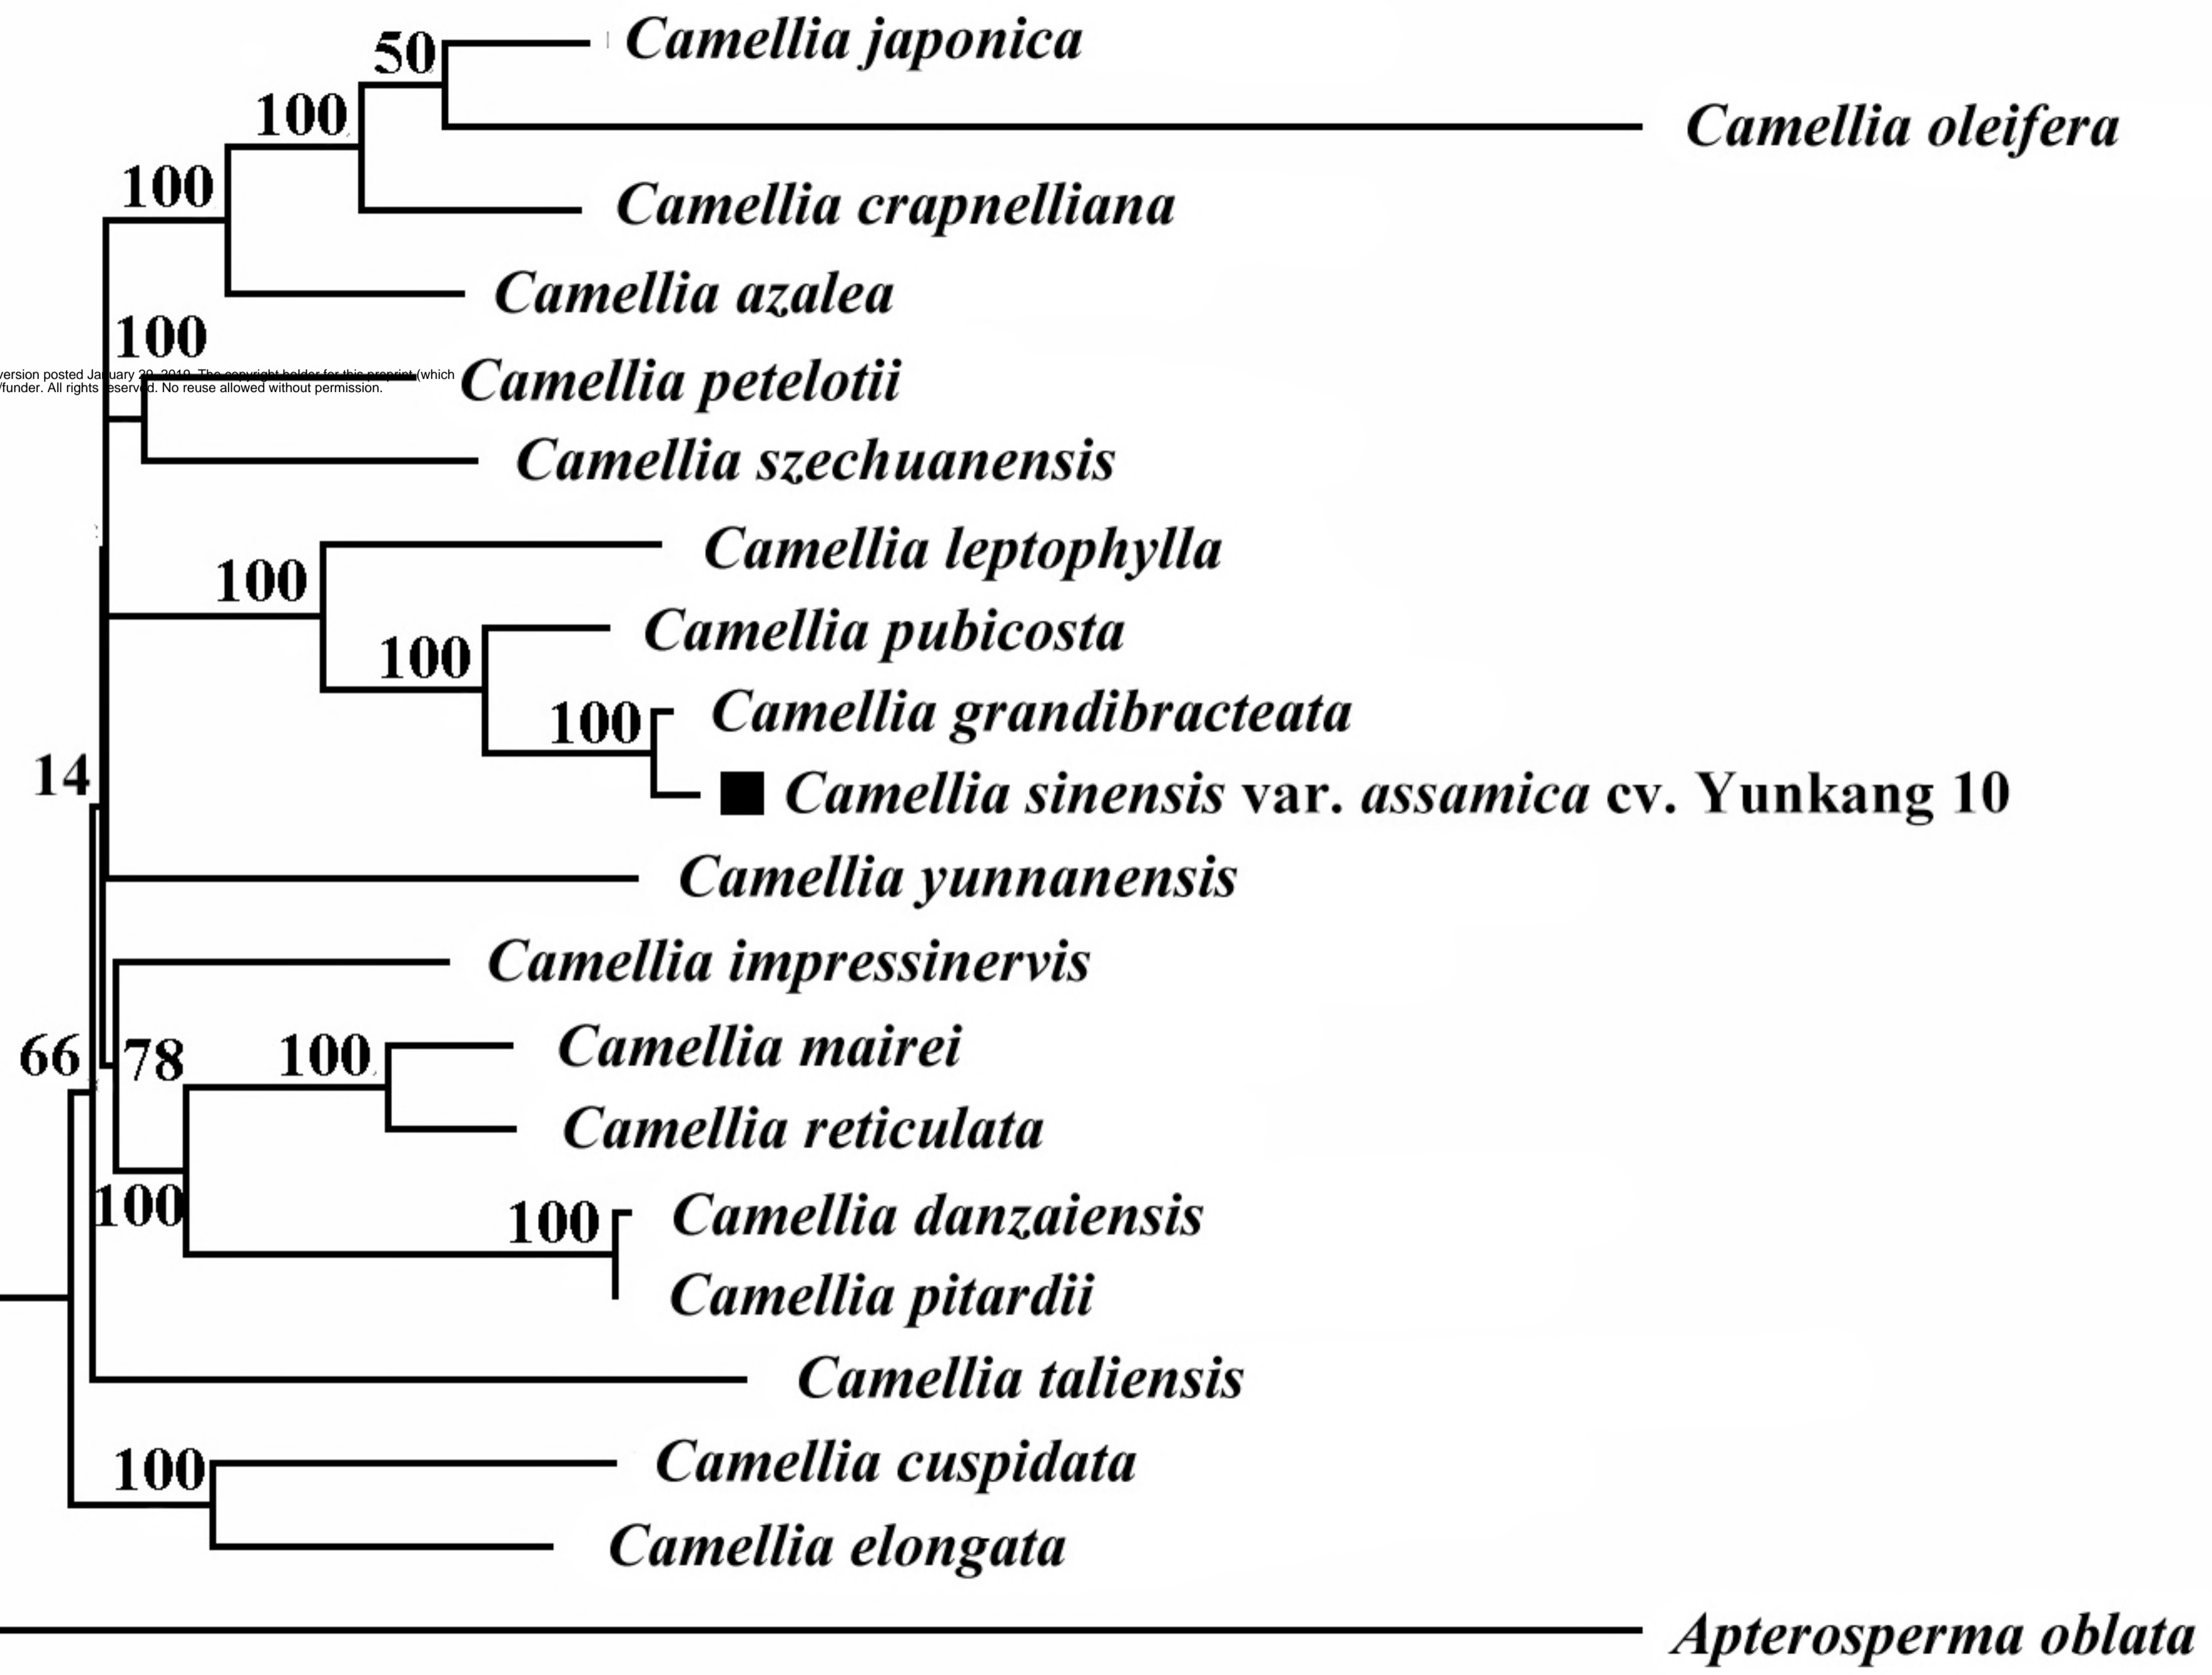

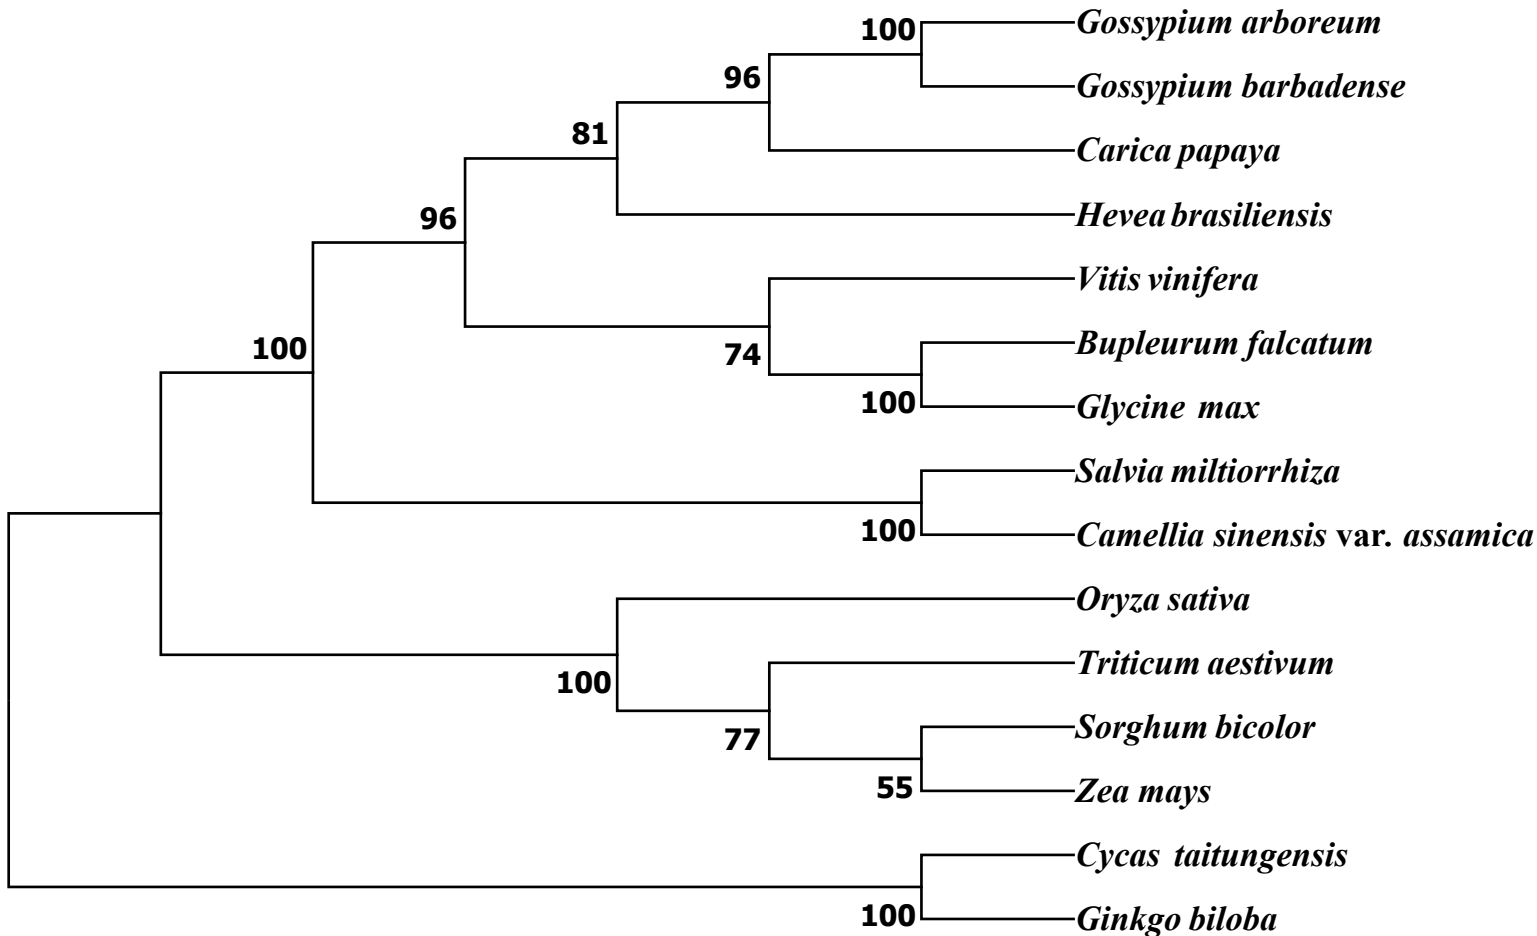



1 **Supplementary Table 1 List of the 15 plant mitochondrial genome sequences**  
2 **used for phylogenetic analysis.**

3

| <b>Organism Name</b>        | <b>GenBank Accession Number</b>        |
|-----------------------------|----------------------------------------|
| <i>Gossypium arboreum</i>   | <a href="#">NC_035073.1/KR736342.1</a> |
| <i>Gossypium barbadense</i> | <a href="#">NC_028254.1/KP898249.1</a> |
| <i>Carica papaya</i>        | <a href="#">NC_012116.1/EU431224.1</a> |
| <i>Hevea brasiliensis</i>   | AP014526.1                             |
| <i>Vitis vinifera</i>       | <a href="#">NC_012119.1/FM179380.1</a> |
| <i>Bupleurum falcatum</i>   | <a href="#">NC_035962.1/KX887330.1</a> |
| <i>Glycine max</i>          | <a href="#">NC_020455.1/JX463295.1</a> |
| <i>Salvia miltiorrhiza</i>  | <a href="#">NC_023209.1/KF177345.1</a> |
| <i>Oryza sativa</i>         | <a href="#">NC_011033.1/BA000029.3</a> |
| <i>Triticum aestivum</i>    | <a href="#">NC_036024.1/EU534409.1</a> |
| <i>Sorghum bicolor</i>      | <a href="#">NC_008360.1/DQ984518.1</a> |
| <i>Zea mays</i>             | <a href="#">NC_007982.1/AY506529.1</a> |
| <i>Cycas taitungensis</i>   | <a href="#">NC_010303.1/AP009381.1</a> |
| <i>Ginkgo biloba</i>        | <a href="#">NC_027976.1/KM672373.1</a> |

4

5
